# Supplementary material
Source: publisher figshare collection journal article supplement (https://acs.figshare.com/ndownloader/files/6204066)
Supplement: Supplementary file 1 [file 6204066]

 
data_shelx
 
_audit_creation_method            SHELXL-2014
_chemical_name_systematic
;
 ?
;
_chemical_name_common             ?
_chemical_melting_point           ?
_chemical_formula_moiety          ?
_chemical_formula_sum
 'C8 H3 Au2 F Fe N6' 
_chemical_formula_weight          651.95

loop_
 _atom_type_symbol
 _atom_type_description
 _atom_type_scat_dispersion_real
 _atom_type_scat_dispersion_imag
 _atom_type_scat_source
 'C'  'C'   0.0033   0.0016
 'International Tables Vol C Tables 4.2.6.8 and 6.1.1.4'
 'H'  'H'   0.0000   0.0000
 'International Tables Vol C Tables 4.2.6.8 and 6.1.1.4'
 'N'  'N'   0.0061   0.0033
 'International Tables Vol C Tables 4.2.6.8 and 6.1.1.4'
 'F'  'F'   0.0171   0.0103
 'International Tables Vol C Tables 4.2.6.8 and 6.1.1.4'
 'Fe'  'Fe'   0.3463   0.8444
 'International Tables Vol C Tables 4.2.6.8 and 6.1.1.4'
 'Au'  'Au'  -2.0133   8.8022
 'International Tables Vol C Tables 4.2.6.8 and 6.1.1.4'
 
_space_group_crystal_system       orthorhombic
_space_group_IT_number            64
_space_group_name_H-M_alt         'C m c a'
_space_group_name_Hall            '-C 2bc 2'
 
_shelx_space_group_comment
;
Possible pseudo/newspace group was suggested by checkCIF analysis
for FpzAu at 200 K suggesting the space group Fmmm (alert type B).
However, XPREP analysis corroborates the assigned Cmca.

The symmetry employed for this shelxl refinement is uniquely defined
by the following loop, which should always be used as a source of
symmetry information in preference to the above space-group names.
They are only intended as comments.
;
 
loop_
 _space_group_symop_operation_xyz
 'x, y, z'
 '-x, -y+1/2, z+1/2'
 'x, -y, -z'
 '-x+1/2, y, -z+1/2'
 'x+1/2, y+1/2, z'
 '-x+1/2, -y+1, z+1/2'
 'x+1/2, -y+1/2, -z'
 '-x+1, y+1/2, -z+1/2'
 '-x, -y, -z'
 'x, y-1/2, -z-1/2'
 '-x, y, z'
 'x-1/2, -y, z-1/2'
 '-x+1/2, -y+1/2, -z'
 'x+1/2, y, -z-1/2'
 '-x+1/2, y+1/2, z'
 'x, -y+1/2, z-1/2'
 
_cell_length_a                    7.2563(3)
_cell_length_b                    10.1992(5)
_cell_length_c                    17.8959(7)
_cell_angle_alpha                 90
_cell_angle_beta                  90
_cell_angle_gamma                 90
_cell_volume                      1324.46(10)
_cell_formula_units_Z             4
_cell_measurement_temperature     250(1)
_cell_measurement_reflns_used     617 
_cell_measurement_theta_min       3.6210 
_cell_measurement_theta_max       29.5400 
 
_exptl_crystal_description        prismatic 
_exptl_crystal_colour             yellow 
_exptl_crystal_density_meas       ? 
_exptl_crystal_density_method     ?              
_exptl_crystal_density_diffrn     3.270          
_exptl_crystal_F_000              1144
_exptl_transmission_factor_min    ?                                             
_exptl_transmission_factor_max    ?                                             
_exptl_crystal_size_max           0.080
_exptl_crystal_size_mid           0.060
_exptl_crystal_size_min           0.060
_exptl_absorpt_coefficient_mu     23.180
_shelx_estimated_absorpt_T_min    0.259
_shelx_estimated_absorpt_T_max    0.337
_exptl_absorpt_correction_type    'multi-scan' 
_exptl_absorpt_correction_T_min   0.36340 
_exptl_absorpt_correction_T_max   1.00000 
_exptl_absorpt_process_details    'CrysAlisPro 1.171.38.41q' 
 
_exptl_special_details
;
CrysAlisPro 1.171.38.41q (Rigaku Oxford Diffraction, 2015)
Empirical absorption correction using spherical harmonics,
 implemented in SCALE3 ABSPACK scaling algorithm.
;
 
_diffrn_ambient_temperature       250(1)
_diffrn_radiation_wavelength      0.71073
_diffrn_radiation_type            MoK\a
_diffrn_source                    ?                       
_diffrn_measurement_device_type   'SuperNova Sapphire3' 
_diffrn_measurement_method        ? 
_diffrn_detector_area_resol_mean  ? 
_diffrn_reflns_number             1982
_diffrn_reflns_av_unetI/netI      0.0312
_diffrn_reflns_av_R_equivalents   0.0210
_diffrn_reflns_limit_h_min        -10
_diffrn_reflns_limit_h_max        7
_diffrn_reflns_limit_k_min        -13
_diffrn_reflns_limit_k_max        7
_diffrn_reflns_limit_l_min        -20
_diffrn_reflns_limit_l_max        23
_diffrn_reflns_theta_min          3.629
_diffrn_reflns_theta_max          29.929
_diffrn_reflns_theta_full         25.000
_diffrn_measured_fraction_theta_max   0.875
_diffrn_measured_fraction_theta_full  0.998
_diffrn_reflns_Laue_measured_fraction_max    0.875
_diffrn_reflns_Laue_measured_fraction_full   0.998
_diffrn_reflns_point_group_measured_fraction_max   0.875
_diffrn_reflns_point_group_measured_fraction_full  0.998
_reflns_number_total              906
_reflns_number_gt                 659
_reflns_threshold_expression      'I > 2\s(I)'
_reflns_Friedel_coverage          0.000
_reflns_Friedel_fraction_max      .
_reflns_Friedel_fraction_full     .
 
_reflns_special_details
;
 Reflections were merged by SHELXL according to the crystal
 class for the calculation of statistics and refinement.
 
 _reflns_Friedel_fraction is defined as the number of unique
 Friedel pairs measured divided by the number that would be
 possible theoretically, ignoring centric projections and
 systematic absences.
;
 
_computing_data_collection        'CrysAlisPro 2015'
_computing_cell_refinement        'CrysAlisPro 2015'
_computing_data_reduction         'CrysAlisPro 2015'
_computing_structure_solution     'SHELXS-2014 (Sheldrick, 2014)'
_computing_structure_refinement   'SHELXL-2014 (Sheldrick, 2014)'
_computing_molecular_graphics     ?
_computing_publication_material   ?
 
_refine_special_details
;
 ?
;
_refine_ls_structure_factor_coef  Fsqd
_refine_ls_matrix_type            full
_refine_ls_weighting_scheme       calc
_refine_ls_weighting_details
'w=1/[\s^2^(Fo^2^)+(0.0324P)^2^] where P=(Fo^2^+2Fc^2^)/3'
_atom_sites_solution_primary      ?
_atom_sites_solution_secondary    ?
_atom_sites_solution_hydrogens    .
_refine_ls_hydrogen_treatment     undef
_refine_ls_extinction_method      none
_refine_ls_extinction_coef        .
_refine_ls_number_reflns          906
_refine_ls_number_parameters      58
_refine_ls_number_restraints      0
_refine_ls_R_factor_all           0.0439
_refine_ls_R_factor_gt            0.0301
_refine_ls_wR_factor_ref          0.0790
_refine_ls_wR_factor_gt           0.0689
_refine_ls_goodness_of_fit_ref    1.005
_refine_ls_restrained_S_all       1.005
_refine_ls_shift/su_max           0.003
_refine_ls_shift/su_mean          0.000
 
loop_
 _atom_site_label
 _atom_site_type_symbol
 _atom_site_fract_x
 _atom_site_fract_y
 _atom_site_fract_z
 _atom_site_U_iso_or_equiv
 _atom_site_adp_type
 _atom_site_occupancy
 _atom_site_site_symmetry_order  
 _atom_site_calc_flag
 _atom_site_refinement_flags_posn
 _atom_site_refinement_flags_adp
 _atom_site_refinement_flags_occupancy
 _atom_site_disorder_assembly
 _atom_site_disorder_group
Au Au 0.5000 0.24566(3) 0.74807(2) 0.03846(17) Uani 1 2 d S T P . .
Fe Fe 0.5000 0.0000 1.0000 0.0185(3) Uani 1 4 d S T P . .
N1 N 0.1920(10) 0.0000 1.0000 0.0267(16) Uani 1 2 d S T P . .
N2 N 0.5000 0.3530(6) 0.5846(3) 0.0315(16) Uani 1 2 d S T P . .
N3 N 0.5000 0.1410(7) 0.9114(3) 0.0338(16) Uani 1 2 d S T P . .
C1 C 0.0946(8) -0.0040(4) 0.9367(3) 0.0305(14) Uani 1 1 d . . . . .
C2 C 0.5000 0.3101(8) 0.6431(4) 0.0315(19) Uani 1 2 d S T P . .
C3 C 0.5000 0.1821(8) 0.8527(5) 0.038(2) Uani 1 2 d S T P . .
F F 0.1664(18) -0.0081(11) 0.8708(7) 0.034(3) Uani 0.25 1 d . . P . .
 
loop_
 _atom_site_aniso_label
 _atom_site_aniso_U_11
 _atom_site_aniso_U_22
 _atom_site_aniso_U_33
 _atom_site_aniso_U_23
 _atom_site_aniso_U_13
 _atom_site_aniso_U_12
Au 0.0535(3) 0.0402(3) 0.0217(2) 0.01401(13) 0.000 0.000
Fe 0.0196(7) 0.0253(9) 0.0108(6) 0.0000(5) 0.000 0.000
N1 0.024(3) 0.030(4) 0.026(4) 0.003(2) 0.000 0.000
N2 0.031(3) 0.032(4) 0.031(4) 0.010(3) 0.000 0.000
N3 0.042(4) 0.034(4) 0.025(3) 0.004(3) 0.000 0.000
C1 0.031(3) 0.037(3) 0.023(3) 0.001(2) -0.004(2) 0.001(3)
C2 0.034(4) 0.035(5) 0.025(4) 0.016(4) 0.000 0.000
C3 0.044(5) 0.037(5) 0.032(4) 0.011(4) 0.000 0.000
F 0.022(6) 0.061(10) 0.020(6) 0.002(5) -0.007(6) 0.005(6)
 
_geom_special_details
;
 All esds (except the esd in the dihedral angle between two l.s. planes)
 are estimated using the full covariance matrix.  The cell esds are taken
 into account individually in the estimation of esds in distances, angles
 and torsion angles; correlations between esds in cell parameters are only
 used when they are defined by crystal symmetry.  An approximate (isotropic)
 treatment of cell esds is used for estimating esds involving l.s. planes.
;
 
loop_
 _geom_bond_atom_site_label_1
 _geom_bond_atom_site_label_2
 _geom_bond_distance
 _geom_bond_site_symmetry_2
 _geom_bond_publ_flag
Au C2 1.990(7) . ?
Au C3 1.981(8) . ?
Fe N1 2.235(7) . ?
Fe N1 2.235(7) 9_657 ?
Fe N2 2.131(6) 10_557 ?
Fe N2 2.131(6) 2_655 ?
Fe N3 2.142(6) . ?
Fe N3 2.142(6) 9_657 ?
N1 C1 1.336(6) . ?
N1 C1 1.336(6) 3_557 ?
N2 C2 1.134(9) . ?
N2 Fe 2.131(6) 2_654 ?
N3 C3 1.131(9) . ?
C1 F 1.290(14) . ?
C1 C1 1.373(12) 11 ?
 
loop_
 _geom_angle_atom_site_label_1
 _geom_angle_atom_site_label_2
 _geom_angle_atom_site_label_3
 _geom_angle
 _geom_angle_site_symmetry_1
 _geom_angle_site_symmetry_3
 _geom_angle_publ_flag
C3 Au C2 179.8(3) . . ?
N1 Fe N1 180.0 . 9_657 ?
N2 Fe N1 90.000(3) 10_557 . ?
N2 Fe N1 90.000(1) 2_655 . ?
N2 Fe N1 90.000(1) 10_557 9_657 ?
N2 Fe N1 90.000(3) 2_655 9_657 ?
N3 Fe N1 90.000(1) . . ?
N3 Fe N1 90.000(3) 9_657 . ?
N3 Fe N1 90.000(3) . 9_657 ?
N3 Fe N1 90.000(1) 9_657 9_657 ?
N2 Fe N2 180.0 10_557 2_655 ?
N2 Fe N3 86.9(3) 10_557 . ?
N2 Fe N3 93.1(3) 2_655 . ?
N2 Fe N3 93.1(3) 10_557 9_657 ?
N2 Fe N3 86.9(3) 2_655 9_657 ?
N3 Fe N3 180.0 . 9_657 ?
C1 N1 C1 116.2(8) . 3_557 ?
C1 N1 Fe 121.9(4) . . ?
C1 N1 Fe 121.9(4) 3_557 . ?
C2 N2 Fe 158.0(7) . 2_654 ?
C3 N3 Fe 159.5(7) . . ?
F C1 N1 124.3(8) . . ?
F C1 C1 113.8(6) . 11 ?
N1 C1 C1 121.9(4) . 11 ?
N2 C2 Au 176.6(8) . . ?
N3 C3 Au 177.4(8) . . ?
 
_refine_diff_density_max    0.808
_refine_diff_density_min   -1.425
_refine_diff_density_rms    0.209

_shelxl_version_number 2014-1

_shelx_res_file
;
TITL ja1378 in Cmce
CELL  0.71073 7.256312  10.199230  17.895945  90.0000  90.0000  90.0000
zerr 4   0.000338  0.000487  0.000665  0.0000  0.0000  0.0000
LATT   7
SYMM  - X, 1/2 - Y, 1/2 + Z
SYMM    X, - Y, - Z
SYMM  1/2 - X,   Y, 1/2 - Z
SFAC  C    H    N    F    FE   AU
UNIT  32   12   24   4    4    8
MERG   2
OMIT    -3.00 180.00
FMAP   2
PLAN   25
SIZE     0.06   0.06   0.08
ACTA    50.00
L.S.   4
WGHT    0.032400
FVAR       1.37163
AU    6    0.500000    0.245659    0.748067    10.50000    0.05346    0.04020 =
         0.02174    0.01401    0.00000    0.00000
FE    5    0.500000    0.000000    1.000000    10.25000    0.01955    0.02527 =
         0.01077    0.00001    0.00000    0.00000
N1    3    0.191966    0.000000    1.000000    10.50000    0.02419    0.03017 =
         0.02579    0.00276    0.00000    0.00000
N2    3    0.500000    0.353021    0.584621    10.50000    0.03121    0.03228 =
         0.03091    0.00989    0.00000    0.00000
N3    3    0.500000    0.141047    0.911353    10.50000    0.04246    0.03403 =
         0.02506    0.00405    0.00000    0.00000
C1    1    0.094630   -0.004035    0.936683    11.00000    0.03136    0.03683 =
         0.02318    0.00089   -0.00403    0.00072
C2    1    0.500000    0.310147    0.643093    10.50000    0.03426    0.03469 =
         0.02544    0.01553    0.00000    0.00000
C3    1    0.500000    0.182066    0.852656    10.50000    0.04420    0.03737 =
         0.03213    0.01089    0.00000    0.00000
F     4    0.166392   -0.008139    0.870805    10.25000    0.02214    0.06065 =
         0.01962    0.00223   -0.00689    0.00462
HKLF    4

REM  ja1378 in Cmce
REM R1 =  0.0301 for     659 Fo > 4sig(Fo)  and  0.0439 for all     906 data
REM     58 parameters refined using      0 restraints

END

WGHT      0.0323      0.0000

REM Highest difference peak  0.808,  deepest hole -1.425,  1-sigma level  0.209
Q1    1   0.5000  0.3583  0.7584  10.50000  0.05    0.81
Q2    1   0.2500  0.0303  0.7500  10.50000  0.05    0.77
Q3    1   0.0000 -0.0003  0.8306  10.50000  0.05    0.74
Q4    1   0.3238  0.1539  0.7549  11.00000  0.05    0.64
Q5    1   0.2500  0.3166  0.7500  10.50000  0.05    0.64
Q6    1   0.1737 -0.1507  0.9736  11.00000  0.05    0.64
Q7    1   0.2500  0.1934  0.7500  10.50000  0.05    0.59
Q8    1   0.6986  0.3324  0.7505  11.00000  0.05    0.56
Q9    1   0.5855  0.2370  0.7930  11.00000  0.05    0.56
Q10   1   0.2003 -0.1599  0.8296  11.00000  0.05    0.55
Q11   1   0.3283  0.3714  0.5789  11.00000  0.05    0.55
Q12   1   0.5000  0.0818  0.9229  10.50000  0.05    0.54
Q13   1   0.0000 -0.1034  0.8315  10.50000  0.05    0.53
Q14   1   0.2577  0.0149  0.8240  11.00000  0.05    0.51
Q15   1   0.2500 -0.0684  0.7500  10.50000  0.05    0.51
Q16   1   0.1374 -0.0023  0.7906  11.00000  0.05    0.50
Q17   1   0.3222  0.3574  0.5206  11.00000  0.05    0.50
Q18   1   0.3401  0.0558  0.7968  11.00000  0.05    0.49
Q19   1   0.3419 -0.0602  0.7994  11.00000  0.05    0.48
Q20   1   0.5000  0.4339  0.7838  10.50000  0.05    0.47
Q21   1   0.2842  0.3365  0.6490  11.00000  0.05    0.46
Q22   1   0.2637 -0.0746  0.9437  11.00000  0.05    0.46
Q23   1   0.2523  0.2467  0.5306  11.00000  0.05    0.46
Q24   1   0.5000  0.2439  0.5095  10.50000  0.05    0.46
Q25   1   0.2165 -0.0340  0.8983  11.00000  0.05    0.45
;
_shelx_res_checksum   73496

_shelx_hkl_file
;
   0   0   3 35.5733 32.0461   3
   0   0   4 580283. 3882.50   3
   0   0   5-12.0752 50.5820   1
   0   0   5-21.7180 61.8627   3
   0   0   6 438097. 4176.00   3
   0   0   6 427079. 3274.80   1
   0   0   7 30.3536 34.3998   1
   0   0   7 96.8783 122.429   3
   0   0   8 579798. 4110.41   1
   0   0   8 573672. 5572.27   3
   0   0   9-9.11437 54.4652   1
   0   0   9 95.6797 111.613   3
   0   0  10 242078. 2742.01   1
   0   0  10 244829. 4085.04   3
   0   0  11-58.9200 85.3852   3
   0   0  11 39.2680 55.3059   1
   0   0  12 399538. 5742.90   3
   0   0  12 396929. 3627.49   1
   0   0  13 183.884 170.476   3
   0   0  13 75.2280 63.4383   1
   0   0  14 81356.0 1654.44   1
   0   0  14 79509.8 2821.30   3
   0   0  15 327.079 196.915   3
   0   0  15-40.4849 66.6611   1
   0   0  16 198067. 4831.55   3
   0   0  17 226.553 249.789   3
   0   0  18 77247.9 3269.94   3
   0   0  19 184.322 178.020   3
   0   0  20 105100. 4099.43   3
   0   0  21 146.748 165.011   3
   0   0  22 28639.1 2272.41   3
   0   0  23 1120.26 433.133   3
   0   2   0 277427. 3085.87   2
   0  -2   0 272951. 3019.83   2
   0  -2   1 1652.39 139.915   3
   0   2  -1 1380.88 228.553   2
   0   2  -1 1766.66 150.859   3
   0  -2   1 1458.84 238.160   2
   0   2   1 1349.15 239.899   2
   0  -2  -1 1792.57 265.777   2
   0  -2  -2 999999. 6371.48   2
   0   2  -2 984121. 5967.67   2
   0   2  -3 2086.75 241.577   1
   0  -2   3 2085.97 239.379   3
   0   2   4 301830. 2513.97   3
   0  -2   4 288467. 2971.21   3
   0   2  -4 291276. 2700.97   1
   0   2   5 862.921 163.980   3
   0  -2   5 1300.84 231.426   3
   0   2  -5 564.958 131.402   1
   0   2   6 579798. 4491.29   3
   0  -2   6 578553. 5046.67   3
   0   2  -6 589338. 4156.06   1
   0   2   7 1187.39 251.985   3
   0   2  -7 1009.37 193.780   1
   0  -2   7 1446.84 294.597   3
   0   2  -8 275279. 3260.47   1
   0  -2   8 271570. 4001.60   3
   0   2   8 270328. 3626.66   3
   0   2  -9 544.045 177.052   1
   0   2   9 777.295 221.861   3
   0  -2   9 912.812 274.604   3
   0  -2  10 413607. 5498.55   3
   0   2  10 405211. 5055.48   3
   0   2 -10 408083. 4792.74   1
   0   2  11 624.256 243.311   3
   0  -2  11 289.274 189.617   3
   0   2  12 161832. 3543.76   3
   0  -2  12 157871. 3730.85   3
   0  -2  13 577.919 251.016   3
   0   2  13 827.045 276.759   3
   0  -2  14 253725. 5175.73   3
   0   2  14 255820. 4901.43   3
   0   2  15 168.594 162.187   3
   0  -2  15 122.908 167.030   3
   0  -2  16 55478.9 2649.48   3
   0   2  16 58565.7 2566.76   3
   0  -2  17-93.6686 208.151   3
   0   2  17-78.7997 121.130   3
   0   2  18 158206. 4572.07   3
   0  -2  18 156285. 4750.44   3
   0   2  19 172.954 227.055   3
   0  -2  19-32.6811 188.066   3
   0  -2  20 47648.3 2842.63   3
   0   2  20 46240.8 2657.29   3
   0  -2  21 399.377 254.173   3
   0   2  21 88.1837 263.720   3
   0  -2  22 61685.0 3428.23   3
   0   2  22 58707.0 3205.96   3
   0   2  23 287.135 339.915   3
   0  -2  23-97.1147 328.105   3
   0  -4   0 621006. 6550.39   2
   0  -4  -1 5674.33 679.006   2
   0  -4   1 4761.15 604.517   2
   0  -4   2 221204. 2242.30   3
   0  -4   2 214241. 3906.13   2
   0  -4  -2 225592. 4109.29   2
   0  -4  -3 4183.65 611.439   2
   0  -4   3 4456.64 383.626   3
   0   4   4 573784. 2903.97   3
   0  -4  -4 577141. 6838.82   2
   0  -4   4 558714. 4547.42   3
   0  -4   5 4150.13 433.705   3
   0   4   5 3751.63 296.168   3
   0  -4  -5 3209.68 557.702   2
   0  -4   6 173164. 2949.51   3
   0   4   6 178053. 2209.67   3
   0   4   7 2607.13 320.653   3
   0  -4   7 3192.45 483.769   3
   0   4   8 383477. 4021.82   3
   0  -4   8 389332. 5000.19   3
   0   4   9 3035.03 399.700   3
   0  -4   9 3028.18 528.405   3
   0   4  10 176899. 3154.90   3
   0  -4  10 179691. 3762.96   3
   0  -4  11 1829.42 441.819   3
   0   4  11 1740.15 359.210   3
   0   4  12 202208. 3812.66   3
   0  -4  12 204173. 4432.62   3
   0  -4  13 1042.11 337.785   3
   0   4  13 789.147 287.999   3
   0   4  14 77660.8 2613.49   3
   0  -4  14 78872.0 2981.33   3
   0   4  15 699.735 321.748   3
   0  -4  15 620.178 290.572   3
   0   4  16 195978. 4552.90   3
   0  -4  16 180647. 4917.77   3
   0  -4  17-16.1541 134.614   3
   0   4  17 505.905 309.509   3
   0  -4  18 38960.6 2439.73   3
   0   4  18 37824.0 2196.91   3
   0   4  19 543.818 329.038   3
   0  -4  19 119.846 244.930   3
   0  -4  20 79257.8 3734.70   3
   0   4  20 76623.8 3364.67   3
   0  -4  21 247.917 305.247   3
   0   4  21 223.674 169.394   3
   0   4  22 29856.4 2264.40   3
   0  -4  22 28745.2 2409.29   3
   0   4  23 56.7046 302.756   3
   0  -6   0 59223.9 2517.92   2
   0  -6   1 4534.91 723.747   2
   0  -6  -1 5622.58 816.428   2
   0  -6  -2 376530. 6503.22   2
   0  -6   2 387191. 6472.44   2
   0  -6  -3 9511.80 1140.52   2
   0  -6  -4 168462. 4433.56   2
   0  -6  -5 6400.96 902.742   2
   0  -6   6 252588. 3832.72   3
   0  -6  -6 253221. 5553.76   2
   0  -6  -7 3587.30 715.039   2
   0  -6   7 3783.44 554.201   3
   0   6   7 3778.56 330.037   3
   0  -6  -8 108529. 3856.46   2
   0  -6   8 117063. 2906.01   3
   0   6   8 113131. 1941.77   3
   0  -6   9 3899.70 587.546   3
   0  -6  -9 3739.67 781.184   2
   0   6   9 3140.15 387.046   3
   0  -6 -10 178181. 5191.29   2
   0  -6  10 172682. 3895.02   3
   0   6  10 176142. 2886.83   3
   0  -6  11 2636.69 557.285   3
   0   6  11 1926.79 354.089   3
   0  -6 -11 1780.83 599.591   2
   0   6  12 63197.5 1997.61   3
   0  -6  12 63058.4 2564.20   3
   0  -6  13 3487.31 667.407   3
   0   6  13 2273.44 417.201   3
   0   6  14 157858. 3542.16   3
   0  -6  14 156318. 4352.91   3
   0   6  15 1544.77 400.754   3
   0  -6  15 1152.25 441.072   3
   0  -6  16 41624.5 2442.91   3
   0   6  16 41822.8 2040.68   3
   0   6  17 914.087 364.396   3
   0  -6  17 306.990 272.107   3
   0  -6  18 74163.1 3486.69   3
   0  -6  19 281.397 212.824   3
   0  -6  20 25105.0 2197.79   3
   0  -6  21 168.513 202.633   3
   0  -8   0 201580. 5460.54   2
   0  -8   1 7069.30 1085.53   2
   0  -8  -1 7905.34 1155.75   2
   0  -8   2 56563.5 2977.01   2
   0  -8  -2 50257.9 2749.77   2
   0  -8  -3 3918.81 871.685   2
   0  -8  -4 168259. 5064.01   2
   0  -8  -5 8036.75 1177.68   2
   0  -8  -6 86463.9 3747.18   2
   0  -8  -7 4490.28 915.432   2
   0  -8  -8 112121. 4373.89   2
   0  -8  -9 3875.30 886.533   2
   0  -8 -10 40750.9 2758.37   2
   0  -8 -11 2099.07 722.436   2
   0  -8 -12 107607. 4667.31   2
   0  -8 -13 1210.05 588.452   2
   0  -8 -14 36358.4 2818.36   2
   0  -8 -15 662.801 493.354   2
   0  -8 -16 69338.3 4011.82   2
   0  -8 -17 769.286 468.321   2
   0  -8 -18 16121.1 2000.74   2
   0  -8 -19 228.713 276.268   2
   0  -8 -20 31606.7 2854.36   2
   0 -10   0 30578.1 2501.37   2
   0 -10  -1 3763.93 913.409   2
   0 -10   1 4681.65 1107.11   2
   0 -10  -2 72186.4 3772.08   2
   0 -10  -3 6269.44 1154.51   2
   0 -10  -4 31051.9 2478.85   2
   0 -10  -5 3223.62 872.146   2
   0 -10  -6 74403.7 3858.98   2
   0 -10  -7 2410.13 774.571   2
   0 -10  -8 25910.9 2350.86   2
   0 -10  -9 3452.09 920.072   2
   0 -10 -10 46697.5 3270.67   2
   0 -10 -11 1538.17 717.019   2
   0 -10 -12 25963.7 2527.20   2
   0 -10 -13 1244.18 593.876   2
   0 -10 -14 45404.2 3446.15   2
   0 -10 -15 849.109 502.069   2
   0 -10 -16 9807.31 1632.63   2
   0 -12   0 39764.8 3306.34   2
   0 -12  -1 3368.04 991.524   2
   0 -12  -2 11153.0 1727.57   2
   0 -12  -3 2026.17 751.681   2
   0 -12  -4 28043.5 2640.34   2
   0 -12  -5 1471.47 613.498   2
   0 -12  -6 11048.7 1683.69   2
   0 -12  -7 2044.59 751.742   2
   0 -12  -8 20172.9 2296.14   2
   0 -12  -9 1269.32 653.936   2
   0 -12 -10 11790.9 1817.35   2
  -1  -1   0 48.5235 28.5435   1
   1   1   0-3.54364 20.5477   1
   1   1   1 10877.1 440.360   2
  -1   1  -1 10807.9 437.355   2
   1   1   1 10674.3 436.245   1
  -1  -1  -1 10088.6 397.254   2
  -1  -1  -1 10245.0 429.112   1
   1   1  -1 10990.3 524.385   1
   1  -1   1 10845.8 457.658   2
  -1  -1   1 10283.0 500.204   1
   1   1   2 392.253 97.2302   2
  -1  -1  -2 349.105 74.4338   1
  -1   1  -2 325.165 73.6262   2
  -1  -1   2 252.848 87.7958   1
  -1  -1  -2 220.110 65.9238   2
   1  -1   2 209.704 72.8719   2
   1   1   2 270.936 65.4976   1
   1   1  -2 311.288 105.998   1
   1   1  -3 2736.83 312.630   1
  -1  -1   3 3332.24 319.220   1
   1   1   3 3272.67 211.826   1
  -1  -1   4 891.216 189.637   1
   1   1  -4 380.876 140.520   1
   1   1   4 766.944 102.575   1
   1   1  -4 822.031 177.854   3
   1  -1  -4 883.994 167.667   3
   1   1  -5 3848.72 380.855   3
   1   1   5 3791.64 206.287   1
   1   1  -5 4082.93 440.656   1
   1  -1  -5 3733.69 347.447   3
  -1  -1   5 3706.97 379.222   1
  -1  -1   6 1974.57 333.147   3
  -1   1   6 2799.31 337.094   3
   1   1  -6 2304.47 367.753   1
  -1  -1   6 1681.12 291.865   1
   1  -1  -6 2138.28 296.157   3
  -1  -1   7 16691.7 911.922   3
  -1   1   7 15585.5 836.136   3
  -1  -1   7 17275.8 869.680   1
  -1  -1   8 2675.25 394.897   1
  -1  -1   8 3535.38 493.531   3
  -1  -1   9 10016.5 806.152   3
  -1  -1   9 10150.2 704.083   1
  -1   1   9 9434.07 750.876   3
  -1  -1  10 4302.35 613.094   3
  -1  -1  10 4433.76 491.357   1
  -1   1  10 6087.38 654.995   3
  -1   1  11 19621.3 1207.92   3
  -1  -1  11 18426.7 983.735   1
  -1  -1  11 19882.3 1250.62   3
   1  -1  11 17549.5 1202.63   3
   1   1  11 17416.5 597.131   1
  -1  -1  12 6673.44 824.832   3
  -1   1  12 6164.34 751.152   3
  -1  -1  12 4565.48 527.490   1
  -1   1  12 4641.53 665.640   1
   1   1  12 6743.89 824.476   3
   1  -1  12 5599.96 759.602   3
  -1  -1  13 3442.44 561.865   3
  -1  -1  13 4523.83 505.438   1
   1  -1  13 3265.84 569.505   3
  -1   1  13 4682.87 642.469   1
   1   1  13 4358.82 621.647   3
  -1   1  13 3557.18 573.832   3
  -1  -1  14 5968.65 840.471   3
   1   1  14 5838.40 822.554   3
  -1  -1  14 4812.78 557.139   1
  -1   1  14 5471.51 766.000   3
   1  -1  14 6509.10 864.500   3
  -1   1  14 3396.17 582.848   1
  -1  -1  15 2329.84 378.618   1
  -1   1  15 1842.84 472.053   3
   1   1  15 1528.21 400.936   3
   1  -1  15 2020.32 476.017   3
  -1  -1  15 1746.70 471.875   3
  -1   1  15 1796.06 383.740   1
  -1   1  16 5473.71 846.078   3
   1  -1  16 4322.36 810.822   3
  -1  -1  16 6475.19 932.354   3
  -1   1  16 3066.45 548.065   1
   1   1  16 4522.62 796.189   3
  -1  -1  16 4227.91 532.641   1
  -1   1  17 560.957 333.212   3
   1   1  17 139.715 101.519   3
   1  -1  17 320.859 244.339   3
  -1  -1  17 101.398 130.529   3
   1   1  18 5850.61 921.461   3
   1  -1  18 6145.73 979.501   3
  -1  -1  18 6120.98 1004.99   3
  -1   1  18 5349.35 909.251   3
   1   1  19 3180.19 665.511   3
  -1   1  19 3255.52 707.259   3
   1  -1  19 2338.90 634.144   3
  -1  -1  19 2388.63 578.780   3
  -1  -1  20 5725.50 993.815   3
   1  -1  20 6097.64 1067.84   3
   1   1  20 5820.87 1040.75   3
  -1   1  20 5496.12 979.706   3
   1   1  21 2315.74 640.557   3
   1  -1  21 1024.48 412.849   3
   1   1  22 3895.61 892.221   3
   1  -1  22 4087.56 952.174   3
   1   1  23 2829.32 776.546   3
   1  -1  23 3141.66 828.933   3
   1   3   0 30.3096 73.5672   2
   1  -3   0 64.1175 77.2277   2
  -1   3   0 74.5375 69.8762   2
  -1  -3   0 57.5838 68.2748   2
   1   3   0-21.9169 61.0710   1
   1   3   1 13112.3 861.961   2
   1   3   1 12790.8 679.712   1
   1   3  -1 12955.2 856.156   2
  -1  -3  -1 10635.4 706.440   2
   1  -3  -1 13003.9 917.639   2
  -1   3  -1 12598.4 793.928   2
   1   3  -1 14126.4 746.382   1
   1  -3   1 11481.9 810.303   2
   1   3  -2 990.198 210.584   1
   1  -3   2 817.697 243.840   2
   1   3  -2 1158.88 263.614   2
   1  -3  -2 1227.73 309.128   2
  -1  -3  -2 975.811 232.064   2
   1   3   2 705.965 244.795   2
  -1   3  -2 857.351 222.620   2
  -1   3  -3 19084.6 970.582   2
   1   3  -3 19043.8 823.568   3
   1  -3  -3 18768.1 548.258   3
  -1  -3  -3 19324.5 1000.03   2
  -1  -3   3 19388.2 856.905   1
   1   3  -3 18635.8 903.229   1
   1  -3   3 19675.8 1072.57   2
  -1  -3  -4 434.811 163.335   2
  -1  -3   4 571.111 165.707   1
   1   3  -4 530.884 160.396   3
   1  -3  -4 569.607 114.310   3
  -1   3  -4 467.560 157.055   2
  -1  -3   5 54566.8 1517.63   1
   1  -3  -5 55621.9 1222.83   3
  -1   3  -5 54232.6 1699.75   2
  -1  -3  -5 53151.1 1780.78   2
   1  -3  -6 1176.31 207.486   3
  -1  -3   6 1011.83 234.540   1
  -1  -3   7 5826.92 518.167   1
   1  -3  -7 6570.87 518.638   3
  -1   3  -8 2394.40 293.686   1
  -1  -3   8 2709.17 469.965   3
  -1  -3   8 2598.50 385.477   1
   1  -3   8 3417.41 497.512   3
  -1  -3   9 24866.5 1331.07   3
  -1   3   9 26023.4 1193.22   3
   1  -3   9 24516.1 1322.80   3
  -1  -3   9 26528.1 1148.02   1
  -1   3  -9 26985.0 978.455   1
  -1   3  10 3990.82 537.854   3
   1  -3  10 3901.27 591.998   3
  -1   3 -10 3656.94 390.816   1
  -1  -3  10 4388.52 616.244   3
  -1  -3  10 3582.95 463.214   1
  -1  -3  11 838.463 217.191   1
  -1   3 -11 701.084 192.568   1
  -1  -3  11 864.657 284.680   3
   1  -3  11 582.941 247.088   3
  -1   3  11 383.311 153.487   3
  -1   3 -12 3531.44 467.151   1
  -1  -3  12 4071.94 684.222   3
   1  -3  12 4844.23 725.117   3
   1   3  12 4453.62 612.635   3
  -1   3  12 4747.92 612.164   3
  -1  -3  12 4028.11 501.635   1
  -1   3  13 3795.84 566.661   3
  -1  -3  13 3710.99 640.258   3
  -1  -3  13 4232.32 481.975   1
   1  -3  13 3824.87 629.593   3
   1   3  13 3857.38 577.142   3
   1   3  14 3589.41 651.750   3
   1  -3  14 5603.84 843.439   3
  -1  -3  14 5687.42 831.729   3
  -1  -3  14 3762.40 474.923   1
  -1   3  14 4354.50 658.566   3
  -1   3  15 1639.13 416.860   3
   1   3  15 585.605 277.425   3
  -1  -3  15 1133.44 264.816   1
  -1  -3  15 544.223 319.417   3
   1  -3  15 956.870 355.521   3
  -1  -3  16 4646.90 849.409   3
  -1   3  16 3966.39 699.053   3
   1   3  16 4759.00 784.793   3
   1  -3  16 3894.21 753.417   3
   1   3  17 15191.1 1364.94   3
   1  -3  17 12969.4 1357.37   3
  -1  -3  17 15710.8 1498.98   3
  -1   3  17 13779.4 1254.99   3
   1   3  18 4283.22 791.745   3
   1  -3  18 4887.37 902.391   3
  -1  -3  18 5362.47 942.833   3
   1   3  19 262.482 192.354   3
   1  -3  19-76.0642 133.527   3
   1   3  20 3599.19 811.037   3
   1  -3  20 4811.08 967.544   3
   1  -3  21 4600.80 948.470   3
   1   3  21 5182.04 933.288   3
   1   3  22 3035.86 763.018   3
   1  -3  22 4160.12 993.884   3
   1   3  23 412.315 302.497   3
   1  -5   0 35.6388 30.4798   3
  -1  -5   0 29.1296 141.131   2
   1  -5   0-121.788 128.812   2
   1   5  -1 1441.14 208.305   3
  -1  -5   1 1502.40 361.987   2
   1  -5   1 1618.18 178.921   3
   1  -5  -1 1477.96 386.873   2
   1  -5   1 661.586 255.813   2
  -1  -5  -1 1065.18 283.988   2
   1  -5  -2 357.794 217.421   2
   1  -5   2 121.835 80.2393   3
   1   5  -2 33.3466 40.3041   3
  -1  -5  -2 79.2309 118.345   2
   1  -5   2 231.252 132.594   2
   1  -5   3 3428.69 583.662   2
   1  -5   3 3059.21 325.504   3
   1   5  -3 3102.93 383.270   3
   1  -5  -3 3173.83 553.832   2
  -1  -5  -3 3764.26 569.526   2
   1  -5   4 1042.71 220.462   3
   1  -5  -4 378.796 239.001   2
  -1  -5  -4 739.800 318.263   2
   1  -5  -5 2572.86 542.769   2
  -1  -5  -5 4398.73 631.167   2
   1  -5   5 3829.32 430.122   3
   1  -5   6 331.049 193.975   3
  -1  -5  -6 309.096 203.263   2
   1  -5   7 37148.9 1522.74   3
  -1  -5  -7 35043.2 1889.21   2
   1  -5   8 936.110 311.247   3
  -1  -5  -8 930.345 375.686   2
   1  -5   9 545.783 236.934   3
  -1  -5  -9 268.441 216.834   2
   1  -5  10 2488.91 491.148   3
   1   5  10 2415.91 421.009   3
  -1  -5 -10 1453.35 476.562   2
   1  -5  11 13870.3 1140.95   3
   1   5  11 14190.2 983.167   3
   1   5  12 1961.48 439.320   3
   1  -5  12 1463.10 452.222   3
   1  -5  13 963.771 335.500   3
   1   5  13 536.396 245.873   3
   1   5  14 3287.19 575.251   3
   1  -5  14 3232.06 654.836   3
   1  -5  15 14574.9 1368.27   3
   1   5  15 13897.9 1187.52   3
   1  -5  16 2476.69 644.359   3
   1   5  16 2656.34 578.760   3
   1  -5  17 3911.79 792.263   3
   1   5  17 3603.88 662.601   3
   1   5  18 1554.82 506.735   3
   1  -5  18 1947.99 629.746   3
   1   5  19 12043.3 1317.60   3
   1  -5  19 13224.6 1538.37   3
   1  -5  20 2906.86 787.064   3
   1   5  20 2188.45 604.820   3
   1  -5  21 359.991 415.402   3
   1   5  21 954.560 414.636   3
  -1  -7   0-92.7132 160.981   2
   1   7   0-19.7561 34.2099   3
   1  -7   0-224.182 205.497   2
  -1  -7   1 5143.70 813.604   2
   1   7   1 4923.93 325.091   3
   1  -7  -1 4503.49 798.191   2
   1   7  -1 5262.36 413.454   3
   1  -7   1 4204.00 779.671   2
  -1  -7  -1 4475.89 740.956   2
   1  -7  -2-121.316 167.280   2
   1  -7   2 214.449 307.556   2
   1   7  -2 90.6379 78.3006   3
  -1  -7  -2 215.005 184.895   2
   1  -7   2 86.4152 62.3883   3
   1   7   2 55.4056 37.5079   3
   1  -7   3 1222.45 208.207   3
   1  -7  -3 1344.36 441.594   2
  -1  -7  -3 1635.59 463.538   2
   1  -7   3 853.716 395.305   2
  -1  -7  -4-56.5348 126.245   2
   1  -7   4 324.705 133.502   3
   1  -7  -4 31.2213 155.985   2
  -1  -7  -5 4471.33 751.315   2
   1  -7   5 6790.41 603.343   3
   1  -7  -5 6800.47 1017.86   2
  -1  -7  -6 291.950 182.011   2
   1  -7  -6-184.396 256.804   2
   1  -7   6 150.096 134.676   3
  -1  -7  -7 717.484 343.268   2
   1  -7  -7 957.786 423.489   2
   1  -7   7 483.520 151.563   3
   1   7   7 657.305 150.568   3
   1   7   8 281.450 117.415   3
   1  -7  -8 114.120 274.326   2
  -1  -7  -8 61.0406 175.315   2
   1  -7   8 525.344 215.451   3
   1  -7   9 20945.3 1324.83   3
  -1  -7  -9 18597.8 1641.38   2
   1   7   9 20719.7 965.275   3
   1  -7  -9 22073.9 2003.64   2
   1  -7  10 830.372 315.194   3
   1  -7 -10 292.490 329.639   2
  -1  -7 -10 342.512 260.735   2
   1   7  10 549.376 178.409   3
   1  -7 -11 374.906 351.231   2
   1  -7  11 305.501 198.941   3
   1   7  11 584.367 193.758   3
  -1  -7 -11 686.201 348.368   2
   1  -7  12 1297.28 410.287   3
  -1  -7 -12 856.706 425.229   2
   1   7  12 372.421 207.152   3
   1  -7 -12 562.016 492.823   2
  -1  -7 -13 16761.1 1708.99   2
   1  -7  13 16827.1 1434.27   3
   1  -7  14 506.061 306.338   3
  -1  -7 -14 757.117 410.206   2
   1  -7  15 5686.34 907.643   3
  -1  -7 -15 6985.96 1160.68   2
   1  -7  16 1524.40 578.528   3
  -1  -7 -16 717.930 409.031   2
   1  -7  17 8793.14 1210.51   3
  -1  -7 -17 8254.40 1298.45   2
   1  -7  18 1375.27 527.799   3
  -1  -7 -18 894.010 465.095   2
  -1  -7 -19 2233.65 721.310   2
   1  -7  19 3236.20 797.257   3
   1  -7  20 323.212 346.262   3
  -1  -7 -20 600.488 418.359   2
  -1  -9   0 377.184 332.664   2
   1  -9   0 137.720 301.227   2
   1  -9   1 32.8867 146.492   2
  -1  -9  -1 173.334 281.554   2
   1  -9  -1 45.2479 265.187   2
   1  -9   2-160.088 212.728   2
  -1  -9  -2 184.940 274.107   2
   1  -9  -2-131.626 308.092   2
   1  -9   3 5388.63 1088.41   2
   1  -9  -3 4964.68 992.977   2
  -1  -9  -3 4703.51 874.858   2
  -1  -9  -4-72.4575 180.009   2
   1  -9  -4 316.458 244.249   2
   1  -9  -5-141.918 372.741   2
  -1  -9  -5 77.1030 173.397   2
   1  -9  -6 54.3100 245.685   2
  -1  -9  -6 691.330 409.712   2
  -1  -9  -7 10807.7 1354.74   2
   1  -9  -7 10277.6 1456.59   2
   1  -9   8 62.2531 120.895   3
   1  -9  -8-2.68013 152.932   2
  -1  -9  -8-203.297 289.699   2
   1  -9  -9 410.302 383.255   2
  -1  -9  -9-315.709 266.511   2
   1  -9   9 175.740 94.6171   3
   1  -9  10 9.54080 105.637   3
   1  -9 -10 118.799 172.677   2
  -1  -9 -10 371.107 270.633   2
   1  -9  11 11094.8 1100.37   3
  -1  -9 -11 12236.8 1570.30   2
   1  -9 -11 10916.6 1660.73   2
   1  -9  12-15.9763 122.142   3
  -1  -9 -12 533.626 425.249   2
   1  -9 -12 16.7166 341.153   2
   1  -9  13 3733.99 687.015   3
   1  -9 -13 5061.00 1184.34   2
  -1  -9 -13 3050.57 773.042   2
   1  -9 -14 909.843 503.984   2
  -1  -9 -14 339.174 371.720   2
   1  -9  14 374.719 254.442   3
   1  -9 -15 7643.13 1442.25   2
  -1  -9 -15 6958.56 1249.12   2
   1  -9  15 8667.61 1149.82   3
   1  -9 -16-82.2240 373.246   2
  -1  -9 -16 220.320 262.760   2
   1  -9  16 214.623 184.309   3
   1  -9 -17 2908.80 911.331   2
  -1  -9 -17 1262.03 478.190   2
   1  -9  17 2212.70 600.895   3
  -1  -9 -18 405.805 352.331   2
   1  -9  18 420.564 310.300   3
  -1  -9 -19 8574.82 1476.73   2
   1 -11   0-227.190 187.608   2
   1 -11  -1 205.481 332.770   2
   1 -11   1 873.710 525.893   2
  -1 -11  -1 801.127 514.934   2
  -1 -11  -2-251.140 367.037   2
   1 -11   2-822.561 495.870   2
   1 -11  -2-887.219 474.715   2
  -1 -11  -3-103.927 246.962   2
   1 -11  -3 199.883 328.650   2
  -1 -11  -4-552.306 457.253   2
   1 -11  -4 201.788 194.748   2
  -1 -11  -5 4869.35 1016.63   2
   1 -11  -5 5605.30 1170.21   2
  -1 -11  -6-80.3801 257.032   2
   1 -11  -6 181.387 326.033   2
   1 -11  -7 290.222 281.469   2
  -1 -11  -7 275.937 362.942   2
   1 -11  -8 210.307 166.103   2
  -1 -11  -8 558.424 311.015   2
   1 -11  -9 5433.03 1219.65   2
  -1 -11  -9 7400.40 1296.70   2
   1 -11 -10 392.650 239.151   2
  -1 -11 -10-41.9331 308.300   2
   1 -11 -11 2415.37 893.642   2
  -1 -11 -11 2011.71 658.051   2
   1 -11 -12-137.933 255.399   2
  -1 -11 -12-14.5079 265.411   2
  -1 -11 -13 7030.10 1322.51   2
   1 -11 -13 6802.71 1423.49   2
  -1 -11 -14 53.9709 192.214   2
   1 -13   0 298.871 328.045   2
   1 -13  -1 871.206 590.036   2
   1 -13  -2 786.119 552.765   2
   1 -13  -3 1142.25 690.952   2
  -1 -13  -3 1625.66 693.461   2
  -1 -13  -4-17.4269 184.441   2
  -1 -13  -5 231.662 267.796   2
  -2   0   0 889732. 6591.24   1
  -2   0   1 219.513 141.108   1
  -2   0  -1-18.9916 63.9048   1
  -2   0   2 310884. 4187.23   1
  -2   0  -2 308333. 3576.34   1
  -2   0   3 65.4388 84.0804   1
  -2   0  -3-33.8943 59.5970   1
  -2   0   4 379452. 5011.81   1
  -2   0  -4 379728. 3294.84   1
  -2   0  -5 11.7993 33.5768   1
  -2   0   5 82.7579 155.770   1
  -2   0  -6 378477. 2400.19   1
  -2   0   6 374985. 5468.11   1
  -2   0   7-0.72207 139.911   1
  -2   0   8 340042. 5589.70   1
  -2   0   9 37.7070 127.212   1
  -2   0  10 182092. 4272.73   1
  -2   0  11 311.695 198.425   1
  -2   0  12 295131. 5545.70   1
  -2   0  13-225.213 222.805   1
  -2   0  14 86401.4 2980.55   1
  -2   0  15-128.379 207.133   1
   2   0  15-12.1247 124.554   3
  -2   0  16 118282. 3498.41   1
   2   0  16 118108. 3940.80   3
  -2   0  17 115.951 102.635   1
   2   0  17 226.952 176.702   3
   2   0  18 68766.7 3209.24   3
   2   0  19-219.209 324.052   3
   2   0  20 83458.2 3775.37   3
   2   0  21-125.129 278.212   3
   2   0  22 25027.9 2218.00   3
  -2  -2   0 447818. 4371.81   1
   2   2   0 483378. 4545.47   1
  -2  -2   1 1301.14 265.907   1
   2   2  -1 1371.68 267.560   1
   2  -2   1 1189.21 272.832   2
   2   2   1 1796.09 274.380   1
  -2  -2  -1 1542.42 270.966   1
   2   2   1 1697.64 279.301   2
  -2  -2   2 558051. 5214.51   1
   2   2   2 578118. 4633.94   1
   2  -2   2 546623. 4822.59   2
   2   2   2 552196. 4722.26   2
   2   2  -2 587128. 5463.43   1
  -2  -2  -2 535296. 4421.74   1
   2   2   3 1222.22 240.676   2
  -2   2  -3 1298.39 210.193   2
   2   2   3 1292.03 224.063   1
  -2  -2   3 1256.01 297.545   1
  -2  -2  -3 1184.51 206.692   1
  -2  -2  -3 1236.84 193.301   2
   2  -2   3 1266.83 234.056   2
   2   2   4 239004. 2754.49   1
  -2  -2  -4 240069. 2669.38   2
  -2  -2  -4 237048. 2705.43   1
  -2  -2   4 234522. 3644.43   1
  -2   2  -4 238967. 2705.12   2
  -2  -2  -5 613.769 152.795   2
  -2  -2   5 840.049 255.592   1
  -2   2  -5 466.155 133.435   2
   2   2   5 326.556 116.928   1
  -2   2  -6 405634. 3860.28   2
  -2  -2   6 402902. 5047.68   1
  -2  -2  -6 409849. 4020.90   2
  -2   2  -7 967.301 235.191   2
   2   2   7 793.240 158.606   1
  -2  -2   7 1104.11 285.276   1
  -2  -2   8 264557. 4282.50   1
   2   2   8 260389. 2490.47   1
  -2   2  -9 528.236 93.0737   1
  -2  -2   9 553.116 228.078   1
   2   2   9 663.115 136.055   1
  -2   2 -10 279947. 2147.08   1
  -2  -2  10 291389. 4612.41   1
   2   2  10 285905. 2390.62   1
   2   2  11 255.375 67.3938   1
  -2  -2  11 280.620 165.596   1
   2   2  12 131131. 1497.64   1
  -2  -2  12 135031. 3205.07   1
  -2  -2  13 422.582 194.500   1
  -2  -2  14 165450. 3701.09   1
   2  -2  14 166844. 4451.88   3
   2  -2  15 206.539 114.283   3
  -2  -2  15-108.702 81.3149   1
   2   2  16 63352.2 2817.02   3
  -2   2  16 64858.2 3077.48   1
  -2  -2  16 73295.2 2557.78   1
   2  -2  16 68662.1 3092.10   3
   2  -2  17-56.8552 193.751   3
   2   2  17-38.4877 123.616   3
  -2  -2  17 169.154 129.140   1
  -2   2  17 14.6625 194.781   1
   2   2  18 106716. 3941.51   3
   2  -2  18 110702. 4203.82   3
   2   2  19 302.758 315.615   3
   2  -2  19-52.5521 204.623   3
   2   2  20 41726.9 2601.34   3
   2  -2  20 44359.9 2833.27   3
   2   2  21 369.824 295.590   3
   2  -2  21-38.0292 132.097   3
   2   2  22 40711.2 2774.17   3
   2  -2  22 45362.7 3042.09   3
   2   2  23-422.182 320.350   3
   2  -4   0 319318. 5453.75   2
  -2  -4  -1 3654.62 504.101   2
   2  -4  -1 3450.63 640.818   2
   2  -4   1 3398.29 591.974   2
   2  -4   2 246049. 4504.59   2
   2  -4  -2 240310. 4859.33   2
  -2  -4  -2 248831. 3827.02   2
  -2  -4   2 240610. 3763.95   1
  -2  -4   3 5304.65 591.665   1
  -2  -4  -3 4414.86 528.795   2
   2  -4   3 4459.27 622.075   2
  -2  -4  -4 403652. 4979.19   2
   2  -4   4 409491. 5874.68   2
  -2  -4   4 410109. 5097.70   1
  -2  -4   5 3587.12 512.495   1
  -2  -4  -5 2613.09 446.284   2
   2  -4  -5 2626.78 339.284   3
  -2  -4  -6 163928. 3358.71   2
   2  -4  -6 165038. 2650.37   3
  -2  -4   6 165854. 3365.81   1
  -2  -4   7 2754.82 474.937   1
  -2  -4  -7 2025.37 417.005   2
  -2  -4   8 258729. 4342.55   1
  -2  -4  -8 260500. 4505.92   2
  -2  -4   9 2081.80 423.179   1
  -2  -4  -9 1620.46 410.079   2
  -2  -4 -10 162256. 3841.92   2
  -2  -4  10 154743. 3452.95   1
  -2   4 -10 157483. 2613.49   1
  -2   4 -11 1308.91 241.794   1
  -2  -4  11 1834.40 400.643   1
  -2  -4 -11 720.225 285.146   2
  -2  -4  12 158129. 3588.46   1
   2  -4  12 158596. 4146.52   3
   2  -4  13 1455.11 438.337   3
  -2  -4  13 841.415 287.517   1
   2  -4  14 80757.7 3219.24   3
  -2  -4  14 79045.6 2616.46   1
   2  -4  15 588.823 275.490   3
   2   4  15 220.709 227.850   3
  -2  -4  15 619.553 281.360   1
   2  -4  16 120014. 4225.78   3
   2   4  16 120624. 3858.21   3
  -2  -4  16 119479. 3259.17   1
   2  -4  17-238.309 270.454   3
   2   4  17 106.577 113.479   3
   2   4  18 40317.4 2384.14   3
   2  -4  18 40664.0 2612.18   3
   2   4  19-37.3929 159.885   3
   2  -4  19 488.729 343.741   3
   2  -4  20 56717.3 3310.10   3
   2   4  20 57962.2 3067.83   3
   2  -4  21 33.7094 215.359   3
   2   4  21 134.289 249.559   3
   2   4  22 29536.8 2336.88   3
   2   4  23 443.261 475.930   3
   2  -6   0 105492. 3774.21   2
  -2  -6  -1 4149.56 687.241   2
   2  -6  -1 4275.35 836.294   2
   2  -6   1 4414.68 806.456   2
  -2  -6  -2 245746. 4774.04   2
   2  -6  -2 236502. 5795.52   2
   2  -6   2 241392. 5582.91   2
   2  -6   3 5117.30 888.513   2
   2  -6  -3 5426.66 935.644   2
  -2  -6  -3 6139.58 792.986   2
  -2  -6  -4 147565. 3739.38   2
   2  -6  -4 152108. 4682.06   2
   2  -6   4 146105. 4392.90   2
   2  -6  -4 147979. 1734.00   3
   2  -6  -5 3792.85 311.768   3
  -2  -6  -5 3521.69 630.272   2
   2  -6  -6 179926. 2323.94   3
   2  -6  -6 181991. 5444.47   2
  -2  -6  -6 184044. 4276.50   2
  -2  -6  -7 3733.29 666.207   2
   2  -6   8 115291. 3089.51   3
  -2  -6  -8 114028. 3537.90   2
   2  -6   9 3656.03 606.271   3
  -2  -6  -9 2576.42 566.639   2
   2  -6  10 137742. 3713.13   3
  -2  -6 -10 132676. 4013.51   2
  -2  -6 -11 2229.88 549.665   2
   2  -6  11 1813.26 495.788   3
   2  -6  12 58812.4 2628.54   3
  -2  -6 -12 62395.9 2890.54   2
   2  -6  13 1348.99 496.277   3
  -2  -6 -13 1112.57 482.474   2
   2  -6  14 112224. 3897.60   3
   2   6  14 110895. 3404.07   3
  -2  -6 -14 118319. 4173.27   2
   2   6  15 913.615 355.969   3
   2  -6  15 1316.37 422.891   3
  -2  -6 -15 872.094 372.598   2
   2   6  16 51290.0 2499.25   3
   2  -6  16 47018.1 2722.99   3
  -2  -6 -16 47302.9 2776.35   2
   2  -6  17 676.172 319.274   3
   2   6  17 703.621 307.599   3
  -2  -6 -17 203.864 215.281   2
   2   6  18 50643.5 2665.32   3
  -2  -6 -18 49737.0 2970.44   2
   2  -6  18 54498.7 3129.54   3
   2  -6  19 845.112 419.490   3
   2  -6  20 20757.8 2053.93   3
   2  -8   0 121307. 4652.08   2
  -2  -8  -1 4566.01 852.060   2
   2  -8   1 3393.07 299.790   3
   2  -8  -1 5098.99 1014.98   2
   2  -8   1 3396.75 868.248   2
   2  -8  -2 55409.8 3193.14   2
   2  -8   2 60048.0 3283.56   2
  -2  -8  -2 58198.8 2823.28   2
   2  -8   2 60537.4 1399.40   3
  -2  -8  -3 4294.77 839.026   2
   2  -8   3 5073.99 1048.55   2
   2  -8   3 4210.88 441.699   3
   2  -8  -3 4511.40 951.806   2
   2  -8   4 119996. 2455.18   3
  -2  -8  -4 120998. 4011.05   2
   2  -8  -4 119615. 4744.35   2
   2  -8   4 122203. 4887.77   2
   2  -8   5 6002.37 618.308   3
   2  -8  -5 6277.11 1162.52   2
  -2  -8  -5 6028.00 929.179   2
   2  -8  -6 80274.1 4010.51   2
   2  -8   6 81383.6 2344.15   3
  -2  -8  -6 82827.4 3358.07   2
   2  -8   7 3971.30 573.648   3
   2  -8  -7 3854.41 917.585   2
  -2  -8  -7 2997.11 704.382   2
   2  -8   8 82173.3 2643.75   3
   2  -8  -8 77036.7 4074.41   2
  -2  -8  -8 79590.7 3360.63   2
   2  -8   9 1769.17 431.666   3
   2  -8  -9 1979.13 730.789   2
  -2  -8  -9 1454.25 516.036   2
   2  -8  10 33721.4 1885.99   3
   2  -8 -10 39533.8 3075.21   2
  -2  -8 -10 40494.7 2499.98   2
   2  -8  11 2411.15 587.547   3
   2  -8 -11 2217.04 795.716   2
  -2  -8 -11 2456.24 661.400   2
   2  -8  12 79780.5 3156.48   3
   2  -8 -12 74106.3 4421.09   2
  -2  -8 -12 82769.6 3750.70   2
   2  -8  13 1779.95 550.532   3
   2  -8 -13 623.647 551.673   2
  -2  -8 -13 1276.50 534.270   2
   2  -8 -14 36988.4 3200.96   2
  -2  -8 -14 38091.6 2638.79   2
   2  -8  14 37807.1 2366.77   3
   2  -8  15 1395.69 534.065   3
   2  -8 -15 1245.34 652.350   2
  -2  -8 -15 1545.54 602.549   2
   2  -8  16 46262.0 2825.79   3
  -2  -8 -16 52488.5 3221.28   2
   2  -8  17 112.720 241.155   3
  -2  -8 -17 1302.23 525.905   2
   2  -8  18 18102.9 1881.18   3
   2  -8  19 820.878 440.751   3
   2 -10   0 31083.9 2694.87   2
   2 -10   1 4702.89 1092.17   2
   2 -10  -1 1370.47 611.013   2
   2 -10  -2 56639.8 3608.98   2
  -2 -10  -2 51352.4 3113.14   2
   2 -10   2 52497.9 3585.55   2
  -2 -10  -3 4717.18 985.785   2
   2 -10   3 2621.57 870.907   2
   2 -10  -3 2945.36 862.768   2
   2 -10  -4 29297.7 2632.00   2
  -2 -10  -4 30054.0 2310.47   2
  -2 -10  -5 4240.87 919.059   2
   2 -10  -5 2661.27 900.153   2
  -2 -10  -6 57540.5 3228.37   2
   2 -10  -6 61652.5 3901.98   2
   2 -10  -7 2165.19 901.175   2
  -2 -10  -7 4005.70 909.089   2
   2 -10  -8 23114.0 2458.74   2
  -2 -10  -8 23240.5 2084.82   2
   2 -10  -9 3527.26 1068.91   2
  -2 -10  -9 1349.35 531.142   2
   2 -10 -10 35317.3 3202.12   2
  -2 -10 -10 38082.9 2721.73   2
   2 -10 -11 615.362 559.462   2
  -2 -10 -11 1005.11 527.038   2
   2 -10 -12 22267.9 2599.52   2
  -2 -10 -12 23393.2 2190.36   2
   2 -10 -13 1385.96 740.317   2
  -2 -10 -13 1302.17 622.220   2
   2 -10 -14 33298.7 3312.60   2
  -2 -10 -14 31433.2 2634.29   2
  -2 -10 -15-1004.46 497.207   2
  -2 -10 -16 12991.6 1751.83   2
   2 -12   0 24106.3 2694.27   2
   2 -12  -1 550.629 414.853   2
   2 -12   1 2880.97 1009.02   2
   2 -12   2 15665.9 2282.96   2
   2 -12  -2 11630.0 1831.74   2
   2 -12  -3 2021.52 862.477   2
   2 -12  -4 23237.9 2584.62   2
  -2 -12  -4 20636.2 2217.49   2
  -2 -12  -5 1271.07 631.126   2
   2 -12  -5 1469.95 743.136   2
   2 -12  -6 11834.4 1854.30   2
  -2 -12  -6 12475.8 1713.75   2
  -2 -12  -7 1304.58 594.907   2
   2 -12  -7 1683.07 791.101   2
  -2 -12  -8 19784.4 2164.14   2
   2 -12  -8 15219.6 2195.72   2
  -2 -12  -9 1414.95 650.831   2
  -2 -12 -10 8214.19 1425.21   2
  -2 -12 -11 1272.41 568.488   2
  -3  -1   0 5.71821 75.4889   1
  -3  -1   1 57329.4 2055.52   1
  -3  -1  -1 53365.6 1858.01   1
   3   1   2 294.344 119.905   2
  -3  -1   2 465.576 235.069   1
   3   1   2 213.820 135.189   1
  -3  -1  -2 327.744 161.859   1
   3   1   3 10591.1 795.430   1
  -3  -1   3 8313.85 844.777   1
  -3  -1  -3 8861.44 676.077   1
   3   1   3 8890.91 446.986   2
   3  -1   3 9695.71 465.373   2
  -3  -1   4 637.378 248.199   1
   3   1   4 595.773 192.013   1
  -3  -1  -4 254.289 138.075   1
  -3  -1   5 1982.76 426.737   1
  -3  -1  -5 2271.96 311.859   1
  -3  -1   6 1047.34 361.328   1
  -3  -1  -6 1140.29 227.384   1
  -3   1  -6 1502.65 277.984   1
  -3   1  -7 15788.5 846.094   1
  -3  -1  -7 16860.5 522.093   2
  -3   1  -7 16823.9 528.526   2
  -3  -1  -7 17798.5 775.144   1
  -3  -1   7 17727.1 1371.62   1
  -3   1  -8 1383.19 236.337   1
  -3  -1   8 1914.75 493.191   1
  -3  -1  -8 2067.31 232.664   2
  -3   1  -8 2051.71 228.429   2
  -3  -1   9 11692.6 1139.10   1
  -3   1  -9 9291.44 476.162   1
  -3  -1  10 4215.93 733.825   1
  -3   1  11 10149.2 1167.15   1
  -3  -1  11 9506.64 1044.08   1
  -3  -1  12 2977.34 665.911   1
  -3   1  12 4400.28 824.957   1
  -3  -1  13 6355.03 879.342   1
  -3   1  13 6401.90 989.874   1
  -3  -1  14 1853.68 565.515   1
  -3   1  14 3597.68 795.225   1
  -3   1  15 9405.46 1239.14   1
  -3  -1  15 9642.16 1095.70   1
  -3   1  16 2681.82 727.174   1
  -3  -1  16 2573.73 595.147   1
  -3   1  17 440.847 288.452   1
  -3  -1  17 700.333 314.561   1
  -3   1  18 3323.63 763.528   1
   3   1  18 5142.50 977.016   3
   3  -1  18 4776.23 952.833   3
  -3  -1  18 3212.22 678.230   1
   3   1  19 3300.18 786.166   3
   3  -1  19 3375.23 771.225   3
   3  -1  20 3225.46 877.469   3
   3   1  20 4272.91 944.480   3
   3  -1  21 938.674 485.859   3
   3   1  21 1210.26 531.240   3
   3  -1  22 2457.38 845.870   3
   3   1  22 1844.93 674.148   3
   3  -3   0-131.692 100.063   2
  -3  -3   0 81.5693 87.2657   1
   3  -3   1 5920.13 698.077   2
   3   3   1 5927.99 665.431   2
  -3  -3   1 5880.28 641.475   1
  -3  -3  -1 6448.57 622.930   1
  -3  -3  -2 218.610 125.040   1
   3  -3   2 180.050 155.499   2
   3   3   2 142.955 138.100   2
  -3  -3   2 130.618 124.742   1
   3   3   3 17275.6 1088.35   2
   3  -3   3 18226.5 1109.51   2
  -3  -3   3 19692.2 1235.09   1
  -3  -3  -3 16219.3 964.156   1
   3   3   4 213.124 109.245   2
   3  -3   4 276.785 118.201   2
  -3  -3   4 694.645 252.241   1
  -3  -3  -4 626.016 203.811   1
  -3   3  -5 28231.3 1129.19   2
  -3  -3   5 29997.6 1587.74   1
  -3  -3  -5 29644.5 1094.12   2
  -3  -3   6 476.182 250.951   1
  -3   3  -6 618.766 166.844   2
  -3  -3  -6 804.012 204.135   2
  -3   3  -7 6820.08 559.167   2
  -3  -3  -7 6936.65 548.706   2
  -3  -3   7 6249.46 763.983   1
  -3  -3   8 1532.17 413.054   1
  -3  -3  -8 2044.13 343.029   2
  -3   3  -8 1643.52 301.153   2
  -3  -3  -9 19374.0 1035.60   2
  -3   3  -9 20598.9 1060.48   2
  -3  -3   9 19408.7 1364.21   1
  -3  -3  10 1217.89 380.415   1
   3   3  10 1455.45 262.023   1
  -3  -3 -10 1622.30 332.980   2
  -3  -3  11 322.709 182.518   1
  -3  -3 -11 344.627 171.542   2
  -3  -3  12 2194.66 519.714   1
  -3  -3 -12 2378.79 453.371   2
  -3  -3  13 5257.81 748.875   1
  -3  -3 -13 6355.67 729.101   2
  -3  -3  14 2760.58 613.417   1
  -3  -3  15 1476.70 401.349   1
  -3  -3  16 2240.62 547.299   1
  -3  -3  17 19990.7 1540.22   1
   3  -3  17 17188.4 1715.38   3
  -3   3  17 19233.3 1849.52   1
   3   3  18 3874.96 812.711   3
   3  -3  18 3120.52 782.122   3
  -3   3  18 2352.33 703.858   1
  -3  -3  18 2185.95 569.683   1
   3  -3  19 15.7164 225.997   3
   3   3  19 405.092 318.499   3
   3  -3  20 2489.80 804.645   3
   3   3  20 2243.07 691.342   3
   3  -3  21 4595.26 1023.29   3
   3   3  21 2950.93 804.771   3
   3   3  22 2428.22 729.206   3
   3  -5   0-37.8124 97.0346   2
   3  -5  -1 16111.6 1453.63   2
   3  -5   1 15681.6 1420.24   2
  -3  -5   1 15602.7 1109.19   1
  -3  -5   2 324.452 214.703   1
   3  -5  -2 276.602 263.269   2
   3  -5   2 118.076 165.926   2
   3  -5  -3 5760.17 896.989   2
  -3  -5   3 6440.06 737.115   1
   3  -5   3 5661.31 808.453   2
   3  -5   4 590.871 271.446   2
  -3  -5  -4 565.172 256.062   2
  -3  -5   4 466.556 250.729   1
  -3  -5  -5 2249.36 407.007   2
   3  -5   5 1833.26 473.452   2
  -3  -5   5 3217.91 556.064   1
  -3  -5   6 146.496 118.278   1
  -3  -5  -6 186.241 141.210   2
  -3  -5  -7 26020.7 1408.62   2
  -3  -5   7 26555.6 1591.04   1
  -3  -5   8 1131.62 374.181   1
  -3  -5  -8 635.999 230.693   2
  -3  -5   9 466.702 242.202   1
  -3  -5  -9 381.142 147.026   2
  -3  -5  10 1535.66 441.035   1
  -3  -5 -10 1439.16 421.514   2
  -3  -5 -11 9551.98 948.836   2
  -3  -5  11 8257.97 932.140   1
  -3  -5 -12 1372.59 423.184   2
  -3  -5  12 1433.84 450.344   1
  -3  -5  13 560.705 270.711   1
  -3  -5 -13 368.859 181.634   2
   3  -5  14 2215.41 622.228   3
  -3  -5  14 1238.26 386.888   1
  -3  -5 -14 1951.82 512.894   2
   3  -5  15 19145.4 1735.01   3
  -3  -5 -15 19014.9 1508.64   2
  -3  -5  15 19134.1 1500.87   1
   3  -5  16 2628.97 737.396   3
  -3  -5  16 1132.65 426.944   1
   3  -5  17 238.951 294.278   3
  -3  -5  17 281.016 212.102   1
   3  -5  18 1036.54 513.617   3
   3   5  18 1474.35 519.971   3
   3  -5  19 9554.94 1401.79   3
   3   5  19 8618.45 1213.76   3
   3  -5  20 2144.34 704.579   3
   3   5  20 1144.35 515.048   3
   3   5  21 208.184 319.419   3
   3   5  22 2085.80 709.528   3
   3  -7   0-72.4762 265.259   2
   3  -7  -1 13289.4 1543.12   2
   3  -7   1 12912.1 1488.41   2
   3  -7  -2 220.075 328.583   2
   3  -7   2-131.786 165.548   2
   3  -7  -3 3096.85 788.157   2
   3  -7   3 2589.18 658.713   2
   3  -7   4 155.682 276.976   2
  -3  -7  -4 490.379 277.656   2
   3  -7  -4 51.1502 244.004   2
  -3  -7  -5 6247.98 829.266   2
   3  -7   5 6682.45 1151.08   2
   3  -7  -5 4683.52 950.015   2
  -3  -7  -6 181.332 210.351   2
   3  -7  -6 349.992 286.587   2
   3  -7  -7 390.970 245.758   2
  -3  -7  -7-43.0504 124.878   2
   3  -7  -8 218.601 271.309   2
  -3  -7  -8 318.130 222.678   2
  -3  -7  -9 14095.2 1277.74   2
   3  -7  10 376.285 252.275   3
  -3  -7 -10 323.865 227.698   2
   3  -7  11 800.654 330.987   3
  -3  -7 -11 1110.61 397.378   2
   3  -7  12 331.730 231.361   3
  -3  -7 -12 350.551 311.037   2
  -3  -7 -13 17684.9 1560.99   2
   3  -7  13 15960.8 1527.90   3
   3  -7  14 616.063 329.213   3
  -3  -7 -14 616.098 368.521   2
   3  -7  15 560.888 290.967   3
   3  -7  16 1405.94 560.438   3
   3  -7  17 8142.60 1239.24   3
   3  -7  18 417.994 345.585   3
   3  -7  19 829.189 470.915   3
   3  -9   0 216.040 294.973   2
   3  -9  -1 1295.97 538.554   2
   3  -9   1 1123.38 501.348   2
   3  -9   2-74.8961 365.579   2
   3  -9  -2 42.2593 262.337   2
   3  -9   3 5430.14 1142.97   2
   3  -9  -3 4668.86 1052.02   2
   3  -9   4-255.600 260.623   2
  -3  -9  -4 140.820 278.268   2
   3  -9  -4 115.941 291.899   2
  -3  -9  -5 840.623 402.600   2
   3  -9  -5 158.024 226.678   2
  -3  -9  -6 200.951 194.365   2
   3  -9  -6 509.615 365.808   2
  -3  -9  -7 8920.06 1140.12   2
   3  -9  -7 6583.23 1325.61   2
  -3  -9  -8-139.357 254.748   2
   3  -9  -8 51.1366 343.210   2
   3  -9   9 118.813 167.981   3
  -3  -9  -9 93.0175 134.174   2
   3  -9  10 7.58567 158.536   3
  -3  -9 -10-171.567 151.507   2
   3  -9  11 8856.15 1089.29   3
   3  -9 -11 9229.89 1708.40   2
  -3  -9 -11 8394.26 1180.76   2
   3  -9  12 108.884 144.899   3
   3  -9 -12 144.191 314.381   2
  -3  -9 -12 244.579 226.540   2
   3  -9  13 962.075 396.057   3
   3  -9 -13 1483.61 753.250   2
  -3  -9 -13 1632.74 582.668   2
   3  -9  14 284.857 301.592   3
   3  -9 -14 676.524 715.426   2
   3  -9  15 13523.2 1560.31   3
   3  -9 -15 12545.2 2141.57   2
   3  -9  16 144.381 310.713   3
   3  -9  17 620.043 373.603   3
   3  -9  18 259.757 405.009   3
   3 -11   0-227.808 461.487   2
   3 -11   1 2034.72 816.505   2
   3 -11  -1 2329.51 818.357   2
   3 -11   2 136.336 195.577   2
   3 -11  -2 316.745 507.642   2
   3 -11   3 89.1604 201.125   2
   3 -11  -3 209.914 282.718   2
   3 -11  -4-214.804 303.239   2
   3 -11  -5 4160.77 1155.41   2
  -3 -11  -6 30.9783 155.147   2
   3 -11  -6 213.731 314.141   2
  -3 -11  -7-50.8720 256.517   2
   3 -11  -7-153.920 287.098   2
  -3 -11  -8-212.250 396.698   2
   3 -11  -8-257.250 660.698   2
  -3 -11  -9 5137.48 1015.06   2
   3 -11  -9 4276.44 1261.90   2
  -3 -11 -10 41.5004 327.516   2
   3 -11 -10 152.608 354.745   2
  -3 -11 -11 922.755 474.079   2
  -3 -11 -12-482.972 444.808   2
  -4   0   0 395042. 5960.92   1
  -4   0   1 214.606 213.101   1
  -4   0  -1 442.690 255.149   1
  -4   0   2 151398. 3859.20   1
  -4   0  -2 156945. 3657.32   1
  -4   0  -3-24.2660 102.020   1
  -4   0   3-16.4236 104.254   1
  -4   0   4 235490. 5046.02   1
  -4   0  -4 230987. 4303.47   1
  -4   0  -5-132.522 152.574   1
  -4   0   5-41.5389 147.860   1
  -4   0   6 123704. 3879.94   1
  -4   0  -6 112181. 2742.37   1
  -4   0  -7-70.4482 82.2674   1
  -4   0   7 67.7487 140.486   1
  -4   0   8 237719. 5683.86   1
  -4   0  -8 247965. 3696.15   1
  -4   0  -9-3.47279 59.9112   1
  -4   0   9-11.4233 177.175   1
  -4   0  10 84443.6 3549.66   1
  -4   0 -10 88033.0 1791.78   1
  -4   0  11 65.1565 133.587   1
  -4   0  12 186222. 5514.24   1
  -4   0  13-276.294 308.337   1
  -4   0  14 46853.5 2827.20   1
  -4   0  15 248.573 283.298   1
  -4   0  16 62324.8 3307.71   1
  -4   0  17-41.7362 121.412   1
  -4   0  18 39066.1 2667.63   1
  -4   0  19-195.282 309.803   1
   4   0  20 52117.6 3369.37   3
   4   0  21-51.5817 234.097   3
  -4  -2   0 200207. 4227.59   1
  -4  -2   1 1038.06 359.289   1
  -4  -2  -1 869.612 306.326   1
   4  -2   2 245843. 4022.21   2
  -4  -2   2 252624. 4990.15   1
  -4  -2  -2 243053. 4366.82   1
   4   2   2 245561. 3828.72   2
  -4  -2  -3 578.086 227.063   1
  -4  -2   3 236.875 235.321   1
   4  -2   3 404.275 162.564   2
   4   2   3 275.196 132.838   2
   4   2   4 96017.9 2181.03   2
  -4  -2   4 96676.2 3253.12   1
   4  -2   4 92679.6 2036.92   2
  -4  -2  -4 94776.6 2605.90   1
  -4  -2   5 322.427 231.258   1
  -4  -2  -5 291.729 155.506   1
  -4  -2   6 237161. 5300.77   1
  -4  -2  -6 249032. 4097.51   1
  -4  -2   7 170.301 123.309   1
  -4  -2  -7 527.678 199.287   1
  -4  -2   8 87161.5 3347.61   1
  -4  -2  -8 91946.7 2313.65   1
  -4  -2  -9 235.450 79.0595   2
  -4  -2   9 141.296 194.762   1
  -4   2  -9 523.978 179.562   1
  -4   2 -10 190381. 3127.34   1
  -4  -2  10 190993. 5096.85   1
  -4  -2 -10 190202. 2134.17   2
  -4   2 -11 28.5417 44.3652   1
  -4  -2  11 61.6116 155.999   1
  -4  -2  12 57838.9 2869.63   1
  -4   2  13 164.893 155.354   1
  -4  -2  13 402.695 199.515   1
  -4   2  14 88554.7 3954.32   1
  -4  -2  14 84610.2 3542.29   1
  -4  -2  15-95.5723 219.685   1
  -4   2  15-138.381 245.920   1
  -4   2  16 41689.7 2858.03   1
  -4  -2  16 40175.9 2459.90   1
  -4   2  17-109.429 345.626   1
  -4  -2  17 127.413 173.779   1
  -4   2  18 65904.8 3696.03   1
  -4  -2  18 61666.4 3131.12   1
  -4   2  19-138.384 270.985   1
   4  -2  20 23726.6 2369.18   3
   4   2  21 416.933 259.607   3
   4  -4   0 139607. 4118.96   2
  -4  -4   0 141626. 3554.67   1
  -4  -4  -1 1357.53 392.026   1
   4  -4  -1 1539.36 477.286   2
   4  -4   1 1341.66 442.594   2
  -4  -4   1 1661.79 432.750   1
   4  -4   2 115471. 3619.83   2
  -4  -4   2 114100. 3354.10   1
  -4  -4  -2 116028. 3109.35   1
  -4  -4  -3 3030.85 517.879   1
  -4  -4   3 2585.68 567.080   1
   4  -4   3 2186.17 491.772   2
   4  -4   4 218994. 4772.06   2
  -4  -4   4 222581. 4902.68   1
  -4  -4  -4 222664. 4221.76   1
  -4  -4   5 1649.63 454.130   1
   4  -4   5 1088.67 403.314   2
  -4  -4   6 56520.1 2578.15   1
  -4  -4   7 795.022 364.537   1
  -4  -4  -8 182044. 3129.43   2
  -4  -4   8 178035. 4681.71   1
  -4  -4  -9 843.365 233.193   2
  -4  -4   9 931.326 370.101   1
  -4  -4 -10 62589.6 1892.71   2
  -4  -4  10 60781.1 2810.69   1
  -4  -4  11 475.945 316.271   1
  -4  -4 -11 739.555 202.845   2
  -4  -4  12 90081.9 3476.85   1
  -4  -4  13 665.397 326.642   1
  -4  -4  14 42928.9 2451.49   1
  -4  -4  15 161.000 269.732   1
  -4  -4  16 62234.3 3003.27   1
  -4  -4  17 0.62817 155.307   1
   4  -4  18 23139.9 2230.50   3
  -4   4  18 18680.6 1979.23   1
  -4  -4  18 21151.9 1789.38   1
   4  -4  19 246.484 306.408   3
  -4   4  19-177.932 147.861   1
   4   4  20 36526.2 2736.65   3
   4   4  21 586.945 500.495   3
   4  -6   0 54029.4 2994.10   2
   4  -6  -1 2322.45 667.218   2
   4  -6   1 2545.09 681.887   2
   4  -6  -2 111035. 4410.43   2
   4  -6   2 110743. 4251.23   2
  -4  -6   2 116692. 3529.25   1
   4  -6  -3 2042.32 690.796   2
   4  -6   3 2726.33 730.619   2
  -4  -6   3 2765.48 605.281   1
   4  -6  -4 64601.5 3527.31   2
   4  -6   4 63977.5 3240.25   2
  -4  -6   4 67859.1 2788.57   1
   4  -6   5 2235.71 685.542   2
   4  -6  -5 4096.04 952.647   2
  -4  -6   5 3069.00 638.168   1
  -4  -6   6 115948. 3761.79   1
  -4  -6  -7 1515.79 437.519   2
  -4  -6   7 2055.20 556.920   1
  -4  -6  -8 43759.6 1965.44   2
  -4  -6   8 37066.8 2182.59   1
  -4  -6  -9 767.149 315.919   2
  -4  -6   9 1556.55 460.350   1
  -4  -6 -10 91576.7 2869.16   2
  -4  -6  10 85249.9 3377.58   1
  -4  -6  11 1170.33 436.618   1
  -4  -6 -11 1162.37 361.574   2
  -4  -6  12 23865.5 1817.37   1
  -4  -6  13 1103.76 442.444   1
  -4  -6  14 55160.8 2812.01   1
  -4  -6  15 1024.06 413.346   1
   4  -6  15 624.753 382.126   3
   4  -6  16 25368.6 2222.71   3
  -4  -6  16 24983.7 1936.64   1
   4  -6  17 249.414 341.657   3
  -4  -6  17 17.5725 236.619   1
   4  -6  18 32376.5 2672.83   3
   4  -8   0 50174.7 3312.35   2
   4  -8  -1 1330.78 549.386   2
   4  -8   1 2252.81 688.106   2
   4  -8  -2 28316.8 2517.94   2
   4  -8   2 31452.0 2606.33   2
   4  -8  -3 2576.36 826.454   2
   4  -8   3 2277.97 744.245   2
   4  -8  -4 75585.9 4260.96   2
   4  -8   4 69263.0 4019.62   2
   4  -8   5 3417.68 1005.14   2
   4  -8  -5 2342.25 792.534   2
   4  -8  -6 29189.8 2778.67   2
  -4  -8  -7 2019.03 544.102   2
   4  -8  -7 1574.87 699.649   2
   4  -8  -8 59766.5 4109.18   2
  -4  -8  -8 63046.7 2844.46   2
  -4  -8  -9 1094.30 446.595   2
   4  -8  -9 740.866 427.320   2
  -4  -8 -10 14147.4 1334.07   2
   4  -8 -10 15497.9 2182.69   2
   4  -8  11 479.431 274.533   3
   4  -8 -11 2098.97 918.760   2
   4  -8  12 49200.5 2782.38   3
   4  -8  13 875.049 438.768   3
   4  -8  14 21548.5 1989.10   3
   4  -8  15 582.594 351.692   3
   4  -8  16 24134.9 2203.76   3
   4  -8  17-120.259 247.526   3
   4 -10   0 15208.2 2043.03   2
   4 -10  -1 1608.66 756.453   2
   4 -10   1 1903.16 731.337   2
   4 -10  -2 28360.3 2797.64   2
   4 -10   2 27792.7 2793.09   2
   4 -10   3 1297.74 749.537   2
   4 -10  -3 1674.61 772.206   2
   4 -10   4 15395.3 2181.25   2
   4 -10  -4 14109.5 2034.20   2
   4 -10  -5 2484.65 947.801   2
   4 -10  -6 41211.8 3568.81   2
   4 -10  -7 1702.50 797.896   2
   4 -10  -8 8431.23 1696.08   2
  -4 -10  -9 986.269 412.390   2
   4 -10  -9 547.902 779.388   2
   4 -10 -10 25054.7 3029.34   2
   4 -10 -11 2355.59 906.227   2
   4 -12   0 12140.8 1980.95   2
   4 -12   1 1278.26 786.854   2
   4 -12  -1 232.739 258.981   2
   4 -12   2 6148.41 1479.87   2
   4 -12  -2 5522.02 1369.60   2
   4 -12   3 1797.34 902.986   2
   4 -12  -3 1646.46 846.095   2
   4 -12  -4 15258.1 2290.83   2
  -5  -1   0 202.672 239.744   1
  -5   1   0-67.7795 141.580   1
  -5   1   1 9635.78 992.001   1
  -5   1  -1 9844.43 977.235   1
  -5  -1   1 11097.5 1116.19   1
  -5  -1  -1 11123.7 1100.55   1
  -5  -1   2 210.222 227.782   1
  -5  -1  -2 274.178 234.314   1
  -5   1   2 10.8835 89.9252   1
  -5   1  -2 117.509 150.519   1
  -5  -1   3 3464.76 658.743   1
  -5  -1  -3 3403.26 583.272   1
   5   1   3 3373.53 368.395   2
   5  -1   3 2731.06 352.012   2
  -5   1   3 3234.00 617.160   1
  -5   1  -3 3953.33 623.842   1
  -5  -1   4-96.5216 108.895   1
  -5  -1  -4 7.07752 119.569   1
  -5   1   4 231.457 204.531   1
  -5  -1   5 136.204 202.926   1
  -5  -1  -5 180.842 89.0510   1
  -5   1   5-86.9575 236.526   1
  -5   1  -5-96.7214 138.370   1
  -5  -1   6 522.319 351.549   1
  -5   1   6 970.566 436.492   1
  -5  -1  -6 827.948 279.185   1
  -5   1  -6 669.807 257.634   1
  -5  -1  -7 264.065 165.432   1
  -5   1  -7 391.469 198.043   1
  -5  -1   7 544.200 321.388   1
  -5   1   7 138.109 258.653   1
  -5   1  -8 790.052 262.360   1
  -5  -1   8 445.246 296.242   1
  -5  -1  -8 877.690 315.390   1
  -5   1   8 1195.95 435.105   1
  -5  -1   9-31.2201 160.285   1
  -5   1  -9 16.7277 125.801   1
  -5   1   9 155.334 195.898   1
  -5  -1  -9 55.4578 102.076   1
  -5  -1  10 768.899 344.790   1
  -5   1 -10 785.410 242.303   1
  -5  -1 -10 1119.51 320.425   1
  -5   1  10 1093.28 430.236   1
  -5  -1  11 3237.39 724.984   1
  -5   1  11 2864.42 701.504   1
  -5  -1  12 1927.47 646.895   1
  -5   1  12 1573.39 610.196   1
  -5  -1  13 2848.97 720.455   1
  -5   1  13 4424.45 916.756   1
  -5   1  14 756.456 427.996   1
  -5  -1  14 718.614 394.124   1
  -5   1  15 3053.13 776.091   1
  -5  -1  15 2821.00 723.198   1
  -5   1  16 817.716 498.064   1
  -5  -1  16 684.349 465.108   1
  -5   1  17 261.972 309.505   1
  -5  -1  17 488.166 290.231   1
  -5   1  18 3221.98 868.465   1
  -5  -1  18 790.858 490.514   1
  -5   1  19 1180.75 532.014   1
  -5  -1  19 1586.97 541.587   1
  -5  -3   0 95.2782 96.4328   1
  -5  -3   1 958.134 304.961   1
  -5  -3  -1 556.444 251.249   1
   5  -3   1 602.705 232.289   2
  -5  -3  -2-50.5801 83.2809   1
   5  -3   2 332.947 196.363   2
  -5  -3   2 192.848 197.653   1
   5  -3   3 6228.07 778.224   2
  -5  -3  -3 6189.50 796.452   1
   5   3   3 5992.23 731.423   2
  -5  -3   3 6948.08 937.160   1
   5   3   4 285.863 172.894   2
  -5  -3  -4 288.321 199.409   1
  -5  -3   4 532.666 312.553   1
   5  -3   4 87.6582 152.951   2
   5  -3   5 7512.49 792.606   2
  -5  -3  -5 7146.36 837.666   1
  -5  -3   5 5422.01 891.746   1
  -5  -3  -6 438.217 213.642   1
  -5  -3   6 93.0011 177.652   1
  -5  -3  -7 236.686 200.816   1
  -5  -3   7 290.097 271.634   1
  -5  -3   8 393.761 406.768   1
  -5  -3  -8 880.048 321.096   1
  -5  -3   9 1864.28 604.720   1
  -5   3 -10 1156.58 298.981   1
  -5  -3  10 991.791 426.690   1
  -5  -3  11-4.21206 117.185   1
  -5  -3  12 726.070 427.699   1
  -5  -3  13 1177.22 489.894   1
  -5  -3  14 1412.59 529.212   1
  -5   3  14 1927.88 695.807   1
  -5  -3  15 65.8205 162.328   1
  -5   3  15 56.2274 214.850   1
  -5  -3  16 852.331 379.276   1
  -5   3  16 1217.05 539.140   1
  -5  -3  17 10058.9 1378.88   1
  -5   3  17 10382.0 1526.85   1
  -5  -3  18 1204.02 554.727   1
  -5   3  18 1050.45 507.390   1
  -5  -3  19 158.846 196.885   1
  -5   3  19-55.8314 149.682   1
  -5  -5   0 148.606 213.062   1
   5  -5   0 91.7325 197.951   2
  -5  -5   1 3787.48 686.726   1
   5  -5  -1 3658.73 770.365   2
   5  -5   1 3003.75 661.148   2
  -5  -5  -1 3284.56 620.290   1
  -5  -5   2-160.273 233.712   1
  -5  -5  -2 244.882 212.668   1
   5  -5  -2-21.1316 223.057   2
   5  -5   2 339.906 284.342   2
  -5  -5   3 2427.98 574.133   1
  -5  -5  -3 1865.69 488.463   1
   5  -5   3 2484.22 638.400   2
  -5  -5  -4 56.6717 133.961   1
   5  -5   4 170.771 238.702   2
  -5  -5   4 311.681 272.359   1
   5  -5   5 199.110 172.303   2
  -5  -5   5-90.6584 179.508   1
  -5  -5   6 83.9453 220.083   1
  -5  -5   7 3629.48 741.109   1
  -5  -5   8 215.213 181.684   1
  -5  -5   9 1391.05 513.365   1
  -5  -5  10 244.246 149.611   1
  -5  -5  11 2101.75 584.267   1
  -5  -5  12 543.026 289.367   1
  -5  -5  13 520.321 351.584   1
  -5  -5  14 625.800 408.731   1
  -5  -5  15 7518.62 1165.15   1
  -5  -5  16 1254.52 471.077   1
  -5  -5  17 286.567 304.186   1
  -5  -5  18 913.172 453.453   1
  -5   5  19 3672.90 1002.74   1
   5  -7   0-83.2120 149.951   2
   5  -7  -1 2830.06 766.556   2
   5  -7   1 4269.85 913.467   2
   5  -7  -2-27.9271 226.192   2
   5  -7   2 113.702 221.035   2
   5  -7  -3 632.778 405.489   2
   5  -7   3 1129.43 435.039   2
   5  -7   4 409.771 365.862   2
  -5  -7   4 818.328 402.363   1
   5  -7  -4-31.3424 292.971   2
   5  -7   5 1399.06 544.547   2
   5  -7  -5 221.232 291.038   2
  -5  -7   5 1086.43 423.312   1
  -5  -7   6 104.212 155.716   1
   5  -7  -6 229.409 313.457   2
   5  -7  -7 1389.85 762.486   2
  -5  -7   7 1921.13 556.631   1
  -5  -7   8 71.2864 128.734   1
  -5  -7   9 3755.50 790.502   1
  -5  -7  10 81.0818 213.648   1
  -5  -7  11 63.4989 142.515   1
  -5  -7  12 74.5615 372.625   1
  -5  -7  13 7540.90 1164.48   1
  -5  -7  14 512.978 413.336   1
  -5  -7  15 446.006 228.443   1
   5  -7  16 250.066 240.992   3
   5  -7  17 2662.27 807.971   3
   5  -9   0 92.5796 363.384   2
   5  -9  -1 567.049 403.252   2
   5  -9   1-127.629 170.882   2
   5  -9  -2 86.9759 248.710   2
   5  -9   2-420.994 347.304   2
   5  -9   3 1644.62 656.320   2
   5  -9  -3 1623.80 710.260   2
   5  -9   4 118.210 241.628   2
   5  -9  -4-144.382 232.279   2
   5  -9   5 83.2475 378.694   2
   5  -9  -5 399.697 438.310   2
   5  -9  -6 589.296 475.297   2
   5  -9  -7 1476.94 669.449   2
   5  -9  -8 879.711 635.759   2
   5  -9  -9 198.761 286.399   2
   5  -9 -10 158.398 347.933   2
   5  -9 -11 2915.21 1113.27   2
   5  -9 -12-603.186 532.132   2
   5 -11   0 148.479 271.667   2
   5 -11   1-444.643 405.078   2
   5 -11  -1 484.815 500.346   2
   5 -11   2-1534.33 705.574   2
   5 -11  -2 24.8503 381.458   2
   5 -11   3-1062.37 610.945   2
   5 -11  -3 943.789 590.127   2
   5 -11   4-687.805 536.293   2
   5 -11  -4-772.965 544.473   2
   5 -11  -5 3767.00 1198.31   2
   5 -11  -6-1102.52 656.599   2
  -6   0   0 152751. 4360.92   1
  -6   0   1 93.8274 146.578   1
  -6   0  -1-160.837 150.872   1
  -6   0   2 45213.1 2408.60   1
  -6   0  -2 44395.2 2318.67   1
  -6   0   3 259.996 276.315   1
  -6   0  -3 144.264 201.800   1
  -6   0   4 79751.5 3320.63   1
  -6   0  -4 81535.1 3077.95   1
  -6   0   5 108.147 214.337   1
  -6   0  -5 149.340 194.145   1
  -6   0   6 31355.2 2173.13   1
  -6   0  -6 31602.1 1881.21   1
  -6   0   7-0.66820 149.958   1
  -6   0  -7 110.893 143.258   1
  -6   0   8 113731. 4345.88   1
  -6   0  -8 108436. 3379.65   1
  -6   0   9 275.823 314.710   1
  -6   0  -9-329.345 193.777   1
  -6   0  10 23399.1 2047.89   1
  -6   0  11 36.3334 194.963   1
  -6   0  12 73020.5 3812.42   1
  -6   0  13-165.303 226.226   1
  -6   0  14 14692.0 1762.49   1
  -6   0  15-186.383 174.331   1
  -6   0  16 27234.5 2504.45   1
  -6   0  17 81.3370 246.217   1
  -6   0  18 16180.9 1984.05   1
  -6   0  19-66.5506 181.063   1
  -6   0  20 17829.7 2117.32   1
  -6  -2   0 48019.6 2546.76   1
  -6   2  -1-103.673 132.597   1
  -6  -2   1-179.746 158.293   1
  -6  -2  -1-67.2771 203.522   1
  -6   2  -2 90320.3 3175.16   1
   6  -2   2 86445.3 2565.73   2
  -6  -2   2 92262.4 3607.29   1
  -6  -2  -2 92089.4 3480.59   1
  -6  -2   3 673.448 353.908   1
   6  -2   3 248.276 145.124   2
  -6   2  -3 363.532 263.686   1
  -6  -2  -3 318.399 197.394   1
  -6   2  -4 34801.1 1949.05   1
  -6  -2   4 33006.3 2223.94   1
  -6  -2  -4 32045.1 1987.62   1
  -6   2   5 219.835 236.776   1
  -6  -2  -5 179.729 196.946   1
  -6  -2   5 143.167 246.120   1
  -6   2  -5 122.887 85.4722   1
  -6   2   6 92595.7 3740.44   1
  -6   2  -6 96375.5 3216.71   1
  -6  -2   6 92461.9 3843.68   1
  -6  -2  -6 96629.3 3449.95   1
  -6  -2  -7 174.870 162.937   1
  -6   2   7 210.989 226.151   1
  -6   2  -7-107.686 126.883   1
  -6   2   8 19565.6 1840.18   1
  -6   2  -8 21354.0 1456.97   1
  -6  -2   8 21005.8 1889.15   1
  -6  -2  -8 22454.0 1641.72   1
  -6   2  -9 181.687 194.498   1
  -6  -2  -9 148.857 98.9246   1
  -6  -2   9 195.794 385.810   1
  -6   2   9 342.606 386.412   1
  -6   2  10 81202.0 3902.82   1
  -6  -2  10 81824.9 3916.59   1
  -6  -2  11 183.740 267.692   1
  -6   2  11 39.8235 157.226   1
  -6   2  12 26474.2 2332.29   1
  -6  -2  12 24839.2 2231.85   1
  -6  -2  13 143.800 205.386   1
  -6   2  13 70.8588 370.658   1
  -6   2  14 39136.6 2945.55   1
  -6  -2  14 43590.2 3082.70   1
  -6  -2  15 599.006 424.251   1
  -6   2  15 44.9913 378.344   1
  -6   2  16 15711.7 1915.91   1
  -6  -2  16 12277.8 1665.02   1
  -6   2  17 8.12427 315.185   1
  -6  -2  17-620.810 394.377   1
  -6   2  18 26922.1 2563.52   1
  -6  -2  18 25017.7 2413.74   1
  -6  -2  19-150.559 244.939   1
  -6   2  19 349.741 358.830   1
  -6   2  20 8604.71 1486.89   1
   6  -4   0 62873.8 2941.28   2
  -6  -4   0 60336.9 2961.28   1
   6  -4  -1 786.505 362.638   2
  -6  -4   1 907.473 424.311   1
   6  -4   1 529.402 325.009   2
  -6  -4  -1 209.243 252.393   1
   6  -4   2 33017.4 2032.44   2
  -6  -4   2 33869.0 2268.98   1
  -6  -4  -2 32167.8 2092.06   1
  -6  -4  -3 633.088 331.483   1
  -6  -4   3 1121.30 482.327   1
   6  -4   3 1086.42 416.069   2
  -6  -4   4 68337.1 3346.99   1
  -6  -4  -4 77051.4 3193.57   1
  -6  -4   5 149.684 304.352   1
  -6  -4  -5 949.688 374.416   1
  -6  -4   6 14109.4 1583.07   1
  -6  -4  -6 14585.1 1395.04   1
  -6  -4  -7 722.186 334.318   1
  -6  -4   7 630.425 384.554   1
  -6  -4   8 77391.1 3802.45   1
  -6  -4   9 776.746 440.074   1
  -6  -4  10 17312.5 1858.43   1
  -6  -4  11-530.090 351.071   1
  -6  -4  12 34791.6 2705.90   1
  -6  -4  13-126.843 181.828   1
  -6  -4  14 14637.6 1791.02   1
  -6   4  15 789.365 498.641   1
  -6  -4  15-1059.27 499.640   1
  -6   4  16 27754.6 2581.42   1
  -6  -4  16 28941.9 2552.52   1
  -6  -4  17 532.736 433.512   1
  -6   4  17-60.4629 188.477   1
  -6  -4  18 6201.64 1206.70   1
  -6   4  18 7223.53 1339.15   1
  -6  -4  19-513.462 365.552   1
   6  -6   0 11835.4 1468.92   2
  -6  -6   0 12824.1 1386.32   1
  -6  -6  -1 822.800 358.330   1
  -6  -6   1 715.790 358.573   1
   6  -6  -1 450.244 359.708   2
   6  -6   1 491.060 314.547   2
   6  -6  -2 44007.5 2996.39   2
   6  -6   2 47343.8 2829.02   2
  -6  -6   2 44976.6 2674.55   1
  -6  -6  -2 44974.2 2542.21   1
   6  -6  -3 767.798 427.983   2
   6  -6   3-103.897 172.514   2
   6  -6  -4 23681.4 2350.68   2
  -6  -6   4 20018.2 1854.15   1
   6  -6  -5 2026.34 691.199   2
  -6  -6   5 1542.29 591.403   1
  -6  -6   6 46517.8 2897.17   1
  -6  -6   7 1055.66 512.882   1
  -6  -6   8 9061.01 1323.71   1
  -6  -6   9 395.912 417.251   1
  -6  -6  10 34246.1 2616.80   1
  -6  -6  11 876.186 453.321   1
  -6  -6  12 9575.94 1417.91   1
  -6  -6  13 7.12673 245.749   1
  -6  -6  14 23383.1 2248.98   1
  -6  -6  15-65.4408 147.610   1
  -6  -6  16 8783.09 1385.89   1
   6  -8   0 24719.3 2348.89   2
   6  -8  -1 496.415 347.594   2
   6  -8   1 350.765 345.833   2
   6  -8  -2 9980.60 1556.03   2
   6  -8   2 8620.81 1368.17   2
   6  -8  -3 628.564 395.449   2
   6  -8  -4 29300.1 2889.22   2
   6  -8  -5 1233.34 690.529   2
   6  -8  -6 10762.1 1816.00   2
   6  -8  -7 225.410 420.067   2
   6  -8  -8 30872.6 3201.62   2
   6  -8  -9 1263.67 744.282   2
   6  -8 -10 4757.15 1279.78   2
   6  -8 -11 561.571 577.673   2
   6  -8 -12 20741.8 2804.55   2
   6 -10   0 4141.24 1071.18   2
   6 -10  -1 1418.79 646.143   2
   6 -10   1 514.782 395.305   2
   6 -10  -2 12891.6 1961.66   2
   6 -10  -3 719.435 609.958   2
   6 -10  -4 5815.52 1435.02   2
   6 -10  -5 359.996 296.658   2
   6 -10  -6 21902.7 2849.08   2
   6 -10  -7 1459.82 756.868   2
  -7  -1   0-313.330 275.553   1
  -7   1   0 105.395 209.698   1
  -7   1  -1 6319.80 914.808   1
  -7  -1   1 6202.49 954.703   1
  -7  -1  -1 6900.06 1000.97   1
  -7   1   1 6503.86 958.826   1
  -7   1  -2 99.8095 187.827   1
  -7  -1   2 373.942 325.660   1
  -7  -1  -2 190.833 204.265   1
  -7   1   2 223.776 237.411   1
  -7   1  -3 3099.99 658.573   1
  -7  -1   3 3439.94 711.823   1
  -7  -1  -3 3324.79 722.914   1
  -7   1   3 3665.12 759.631   1
  -7   1  -4-174.293 204.555   1
  -7  -1   4 391.127 288.241   1
  -7  -1  -4 443.705 314.118   1
  -7   1   4-155.702 210.458   1
  -7   1  -5 1978.30 507.592   1
  -7  -1   5 1077.92 374.056   1
  -7  -1  -5 2053.23 547.853   1
  -7   1   5 982.334 379.007   1
  -7   1  -6 205.543 238.515   1
  -7  -1   6 8.47298 157.571   1
  -7  -1  -6 24.6910 97.6982   1
  -7   1   6 142.051 267.448   1
  -7  -1  -7 1501.65 459.938   1
  -7   1  -7 1393.79 389.818   1
  -7  -1   7 1554.82 503.655   1
  -7   1   7 1407.42 509.325   1
  -7   1   8 347.398 254.070   1
  -7  -1  -8 603.603 304.851   1
  -7  -1   8 378.950 346.468   1
  -7   1  -8 250.459 130.909   1
  -7   1   9 1021.68 488.708   1
  -7  -1   9 1178.80 444.065   1
  -7   1  10 428.425 399.805   1
  -7  -1  10 333.111 370.603   1
  -7   1  11 3459.52 857.659   1
  -7  -1  11 2821.57 761.638   1
  -7   1  12 474.606 314.154   1
  -7  -1  12 268.335 298.454   1
  -7   1  13 1404.25 593.812   1
  -7  -1  13 2477.92 761.196   1
  -7   1  14 884.579 550.183   1
  -7  -1  14 458.362 277.584   1
  -7   1  15 2621.78 792.344   1
  -7  -1  15 2691.58 854.053   1
  -7   1  16 508.913 485.424   1
  -7  -1  16 556.704 357.414   1
  -7  -1  17 102.600 297.133   1
  -7  -3   0 32.0775 175.756   1
  -7  -3   1 934.225 418.641   1
  -7   3  -1 960.303 350.560   1
  -7  -3  -1 676.583 333.036   1
  -7   3  -2-233.930 232.535   1
  -7  -3  -2 343.183 281.842   1
  -7  -3   2-37.9583 144.522   1
  -7  -3  -3 3007.75 690.282   1
  -7   3  -3 5211.12 842.052   1
  -7  -3   3 3882.18 816.057   1
  -7  -3  -4-201.399 295.866   1
  -7   3  -4 162.942 216.903   1
  -7  -3   4 72.0308 257.066   1
  -7  -3  -5 3189.64 702.164   1
  -7   3  -5 4669.90 783.144   1
  -7  -3   5 5203.64 954.021   1
  -7   3   6 628.610 416.657   1
  -7   3  -6 260.883 169.656   1
  -7  -3  -6-98.5091 234.884   1
  -7   3   7 362.782 227.320   1
  -7  -3  -7 927.927 392.808   1
  -7  -3   7 697.789 379.715   1
  -7   3  -7 354.139 298.055   1
  -7   3   8 61.8528 293.002   1
  -7  -3  -8 507.814 306.444   1
  -7  -3   8 405.710 347.852   1
  -7   3   9 1733.62 582.231   1
  -7  -3   9 3455.67 831.141   1
  -7   3  10 163.003 301.302   1
  -7  -3  10 514.494 418.790   1
  -7   3  11 104.177 176.383   1
  -7  -3  11 209.342 270.490   1
  -7   3  12 89.0530 284.135   1
  -7  -3  12 1069.98 530.811   1
  -7   3  13 1542.33 576.523   1
  -7  -3  13 2214.00 701.983   1
  -7  -3  14-148.358 231.068   1
  -7   3  14 597.845 468.593   1
  -7  -3  15 1152.83 514.188   1
  -7   3  15 506.311 386.541   1
  -7  -3  16 268.538 302.058   1
  -7  -5   0-93.9406 149.809   1
  -7  -5   1 2386.02 671.481   1
  -7  -5  -1 3148.42 769.052   1
  -7  -5  -2 144.585 262.911   1
   7  -5  -2-111.615 318.950   2
  -7  -5   2 172.636 220.508   1
   7  -5  -3 1859.90 592.443   2
  -7  -5   3 1190.31 436.906   1
  -7  -5  -3 1855.25 619.316   1
  -7  -5  -4-26.3246 158.431   1
  -7  -5   4-252.982 304.961   1
  -7  -5  -5 1159.86 406.489   1
  -7  -5   5 375.181 310.249   1
  -7  -5  -6 58.8751 112.831   1
  -7  -5   6 56.7064 233.508   1
  -7  -5   7 3183.08 827.505   1
  -7  -5   8-92.8638 264.962   1
  -7  -5   9 640.487 473.747   1
  -7  -5  10-56.7503 313.026   1
  -7  -5  11 1568.24 561.154   1
  -7  -5  12-1068.84 524.319   1
  -7  -5  13 217.816 222.391   1
  -7  -7   0-76.3277 257.364   1
  -7  -7   1 1868.84 594.143   1
  -7  -7   2-148.588 205.186   1
   7  -7  -2-266.435 382.728   2
   7  -7  -3 200.945 299.153   2
  -7  -7   3 1290.10 531.682   1
   7  -7  -4 838.544 527.413   2
  -7  -7   4 416.553 332.772   1
   7  -7  -5 1235.16 601.003   2
  -7  -7   5 2012.36 703.589   1
  -7  -7   6-29.6656 210.963   1
   7  -7  -6 230.423 205.621   2
  -7  -7   7-194.577 304.682   1
   7  -7  -7 3.91954 266.034   2
  -7  -7   8 949.116 579.306   1
   7  -7  -8-134.857 388.862   2
  -7  -7   9 1216.29 510.387   1
   7  -9  -4 174.591 361.157   2
   7  -9  -5-4.26768 258.519   2
   7  -9  -6 553.829 475.560   2
   7  -9  -7 2160.55 869.531   2
  -8   0   0 32639.8 2260.68   1
  -8   0   1 110.354 233.390   1
  -8   0  -1 213.123 199.910   1
  -8   0   2 9618.29 1235.48   1
  -8   0  -2 11001.8 1297.08   1
  -8   0   3 166.869 267.269   1
  -8   0  -3-86.9274 263.100   1
  -8   0   4 19498.0 1808.01   1
  -8   0  -4 21247.3 1797.10   1
  -8   0   5-31.4260 269.529   1
  -8   0  -5 262.477 208.128   1
  -8   0   6 12244.1 1494.01   1
  -8   0  -6 11375.8 1260.58   1
  -8   0   7 608.254 494.748   1
  -8   0   8 19941.5 1974.05   1
  -8   0   9 334.472 343.956   1
  -8   0  10 7934.09 1302.61   1
  -8   0  11 136.157 351.951   1
  -8   0  12 21238.6 2212.37   1
  -8   2   0 12323.8 1410.78   1
  -8  -2   0 12830.4 1475.57   1
  -8  -2   1-182.002 275.164   1
  -8  -2  -1 109.120 133.605   1
  -8   2   1-324.168 318.435   1
  -8   2  -1-7.31734 147.932   1
  -8   2   2 24301.9 2046.29   1
  -8   2  -2 23698.9 1920.67   1
  -8  -2   2 21432.8 1958.36   1
  -8  -2  -2 24182.8 2025.05   1
  -8  -2  -3 324.169 231.744   1
  -8   2  -3 324.926 210.861   1
  -8  -2   3 18.0031 237.772   1
  -8   2   3 25.4697 194.558   1
  -8   2  -4 6588.99 988.342   1
  -8  -2  -4 8771.60 1241.26   1
  -8  -2   4 7663.80 1160.74   1
  -8   2   4 7303.95 1148.51   1
  -8   2  -5 236.981 201.574   1
  -8  -2  -5 7.84217 166.125   1
  -8  -2   5-222.123 156.406   1
  -8   2   5-92.8514 249.887   1
  -8   2   6 22409.0 2116.46   1
  -8   2  -6 19856.4 1636.30   1
  -8  -2   6 18373.1 1848.62   1
  -8  -2  -6 20131.7 1819.53   1
  -8  -2   7-257.819 339.908   1
  -8   2   7 30.4882 160.673   1
  -8  -2   8 7681.12 1233.66   1
  -8   2   8 9544.08 1434.72   1
  -8  -2   9 232.852 301.703   1
  -8   2   9 265.115 268.599   1
  -8   2  10 18850.0 2074.57   1
  -8  -2  10 17091.4 1933.56   1
  -8   2  11 458.583 410.162   1
  -8  -2  11 68.8549 177.047   1
  -8   2  12 5257.21 1134.67   1
  -8  -2  12 5198.63 1114.95   1
  -8   4   0 17310.0 1750.29   1
  -8  -4   0 13643.5 1659.08   1
  -8   4   1 287.058 280.611   1
  -8   4  -1-65.4258 191.320   1
  -8  -4   1 61.5114 198.675   1
  -8  -4  -1 463.622 362.786   1
  -8   4   2 7232.86 1185.15   1
  -8  -4   2 8362.34 1302.33   1
  -8   4  -2 8786.34 1233.49   1
  -8  -4  -2 9494.77 1354.28   1
  -8   4   3 233.327 229.505   1
  -8  -4   3-23.2513 238.423   1
  -8   4  -3-40.9544 176.563   1
  -8  -4  -3 400.794 297.218   1
  -8   4   4 21749.8 2103.35   1
  -8   4  -4 21471.8 1870.29   1
  -8  -4   4 20657.1 2058.61   1
  -8  -4  -4 19680.4 1931.97   1
  -8   4   5 174.979 333.249   1
  -8  -4   5 562.223 392.418   1
  -8  -4  -5 413.036 315.205   1
  -8   4  -5-195.321 203.310   1
  -8  -4   6 5066.24 1082.42   1
  -8   4   6 6392.40 1166.01   1
  -8   4  -6 5554.51 929.700   1
  -8  -4  -6 3973.93 870.613   1
  -8  -4   7 176.106 303.632   1
  -8   4   7 181.899 385.985   1
  -8   4   8 16326.5 1964.18   1
  -8  -4   8 15977.5 1906.82   1
  -8  -4   9 109.075 197.372   1
  -8   4   9-131.172 266.532   1
  -8  -4  10 5088.55 1126.53   1
  -8   4  10 6732.96 1297.58   1
  -8  -6   0 3633.15 864.883   1
  -8  -6  -1-313.629 383.114   1
  -8  -6   1 25.6280 141.225   1
  -8  -6   2 11609.6 1592.48   1
  -8  -6  -2 12659.2 1625.91   1
  -8  -6   3 185.284 233.112   1
  -8  -6  -3-236.430 319.189   1
  -8  -6   4 6281.47 1179.49   1
  -8  -6   5 58.7021 319.960   1
  -8  -6   6 9673.26 1516.22   1
  -9   1   0-477.824 302.063   1
  -9  -1   0-104.562 217.285   1
  -9   1   1 567.245 296.157   1
  -9   1  -1 501.015 329.267   1
  -9  -1   1 1757.33 605.309   1
  -9  -1  -1 1241.45 445.900   1
  -9   1   2 103.048 321.146   1
  -9   1  -2 239.774 126.934   1
  -9  -1   2 517.259 386.628   1
  -9  -1  -2-46.2266 187.700   1
  -9   1   3 383.581 264.825   1
  -9   1  -3 441.323 267.395   1
  -9  -1   3 626.333 379.006   1
  -9  -1  -3 344.533 307.319   1
  -9   1   4 282.107 219.701   1
  -9   1  -4-76.4560 113.903   1
  -9  -1   4-74.2891 316.568   1
  -9  -1  -4-19.3831 160.397   1
  -9  -1  -5 536.315 248.444   1
  -9   1   5 774.578 454.102   1
  -9  -1   5 922.768 448.831   1
  -9   1   6 1013.32 548.975   1
  -9  -1   6-438.298 282.201   1
  -9   1   7 2528.56 700.771   1
  -9  -1   7 1713.20 609.453   1
  -9  -3   0-250.583 134.092   1
  -9   3   0-268.203 318.829   1
  -9  -3   1-116.468 150.307   1
  -9  -3  -1 59.5544 184.327   1
  -9   3   1 90.9385 181.131   1
  -9   3  -1 363.142 310.551   1
  -9   3  -2 356.214 403.714   1
  -9  -3   2 320.782 298.436   1
  -9  -3  -2 13.7792 208.519   1
  -9   3   2 6.86917 153.419   1
  -9   3  -3 1550.09 550.720   1
  -9  -3  -3 611.872 409.489   1
  -9   3   3 1305.74 544.134   1
  -9   3  -4-299.381 238.886   1
  -9  -3   4 111.045 350.006   1
  -9  -3  -4-49.2627 190.619   1
  -9   3   4-682.169 410.598   1
  -9  -3   5 2869.99 769.416   1
  -9  -3  -5 1401.25 498.136   1
  -9   3   5 2023.87 708.319   1
  -9  -5   0 194.268 210.463   1
  -9   5   0 87.6932 239.651   1
  -9  -5   1 272.704 391.271   1
  -9  -5  -1 728.306 384.158   1
  -9   5   1 404.877 388.125   1
  -9   5  -1 1054.29 470.271   1
  -9  -5  -2-362.778 312.192   1
  -9   5   2-70.8748 264.996   1
  -9   5  -2-91.9026 204.526   1
  -9   5  -3 459.057 330.002   1
  -9  -5  -3-851.658 454.625   1
  -9  -5  -4 70.4646 188.498   1
  -9   5  -4-33.8228 164.369   1
 -10   0  -1 148.978 227.074   1
 -10   0  -2 210.035 274.822   1
 -10   0  -3 353.072 283.912   1
 -10   2  -2 8076.21 1245.46   1
 -10  -2  -3-482.766 329.537   1
   0   0   0    0.00    0.00   0
TITL ja1378 in Cmce
REM Cmce (#64 in standard setting)
CELL 0.71073   7.256312  10.199230  17.895945  90.0000  90.0000  90.0000
ZERR    6.00   0.000338   0.000487   0.000665   0.0000   0.0000   0.0000
LATT  7
SYMM -x,-y+1/2, z+1/2
SYMM -x, y+1/2,-z+1/2
SYMM  x,-y,-z
SFAC C H N O
UNIT 66.00 60.00 6.00 6.00
TREF
HKLF 4
END
;
_shelx_hkl_checksum   60036
